# Supplementary material for: Short-term power load forecasting based on gray relational analysis and support vector machine optimized by artificial bee colony algorithm
Source: PeerJ Comput Sci. 2022 Sep 21;8:e1108. doi: 10.7717/peerj-cs.1108 (PMC9575856; doi:10.7717/peerj-cs.1108)
Supplement: Data S1 [file peerj-cs-08-1108-s001.xlsx]

## Sheet: Sheet1
Data	Minimum temperature	Maximum temperature	Whether it is a working day	Whether it is a holiday	00:00:00	00:15:00	00:30:00	00:45:00	01:00:00	01:15:00	01:30:00	01:45:00	02:00:00	02:15:00	02:30:00	02:45:00	03:00:00	03:15:00	03:30:00	03:45:00	04:00:00	04:15:00	04:30:00	04:45:00	05:00:00	05:15:00	05:30:00	05:45:00	06:00:00	06:15:00	06:30:00	06:45:00	07:00:00	07:15:00	07:30:00	07:45:00	08:00:00	08:15:00	08:30:00	08:45:00	09:00:00	09:15:00	09:30:00	09:45:00	10:00:00	10:15:00	10:30:00	10:45:00	11:00:00
2002-11-01	4	13	1	0	1392.11	1438.94	1463.21	1366.86	1402.06	1349.32	1407.42	1387.38	1340.63	1331.87	1334.36	1294.82	1372.65	1323.77	1322.43	1293.89	1288.02	1307.68	1302.06	1306.78	1344.06	1296.37	1378.28	1410.16	1412.99	1461.34	1464.13	1472.6	1468.78	1504.19	1515.71	1561.91	1635.72	1676.01	1701.64	1779.75	1781.15	1833.84	1843.54	1869.53	1871.22	1916.87	1914.36	1965.96	1947.37
2002-11-02	6	16	0	0	1456.71	1447.84	1419.83	1418.98	1457.01	1391.81	1430.7	1398.11	1462.9	1395.33	1385.98	1416.1	1339.37	1380.31	1322.68	1360.3	1370.24	1378.82	1341.14	1320.46	1379.76	1360.01	1323.39	1332.26	1413.44	1429.65	1380.28	1460.71	1422.39	1505.57	1561.68	1522.03	1576.93	1659.05	1672.44	1685.23	1692.41	1735.46	1755.86	1810.18	1825.51	1848.56	1838.52	1864.6	1830.56
2002-11-03	5	14	0	0	1421.65	1472.94	1383.19	1428.11	1364.17	1393.34	1338.24	1384.53	1364.5	1292.54	1347.14	1276.1	1340.06	1287.47	1286.44	1368.83	1329.26	1328.53	1377.34	1395.83	1349.39	1319.86	1374.74	1375.89	1398.34	1372.59	1434.18	1458.42	1442.62	1498.88	1503.09	1597.34	1605.97	1641.02	1674.56	1679.27	1670.34	1742.94	1738.28	1785.66	1745.44	1815.93	1793.11	1857.44	1852.65
2002-11-04	2	16	1	0	1412.47	1409.32	1360.92	1384.24	1387.1	1377.55	1379.51	1370.32	1381.72	1333.43	1321.24	1365.7	1353.95	1339.8	1298.4	1358.45	1370.08	1365.82	1325.78	1326.98	1367.15	1355.23	1332.9	1389.56	1403.19	1507.15	1472.74	1526.47	1498.38	1548.56	1588.2	1675.99	1698.93	1770.97	1776.54	1815.12	1828.86	1872.22	1875.47	1936.22	1935.46	1975.51	1977.12	2015.5	2023.55
2002-11-05	6	21	1	0	1433.03	1464.24	1414.09	1466.38	1442.97	1416.13	1368.43	1429.35	1393.87	1354.02	1358.2	1410.14	1311.65	1402.23	1326.84	1423.33	1398.92	1448.83	1389.23	1431.49	1394.18	1399.15	1437.31	1428.68	1466.44	1467.36	1495.02	1546.43	1570.53	1584.04	1615.97	1644.1	1703.3	1750.04	1760.5	1805.38	1809.35	1843.66	1841.3	1894.46	1900.59	1948.26	2006.33	1953.54	1984.79
2002-11-06	8	22	1	0	1425.53	1444.26	1481.14	1468.7	1414.22	1429.37	1401.92	1418.42	1427.7	1422.39	1393.86	1378.94	1342.71	1372.27	1379.04	1368.69	1338.73	1360	1395.66	1383.99	1388.24	1402.89	1462.23	1435.56	1519.61	1492.16	1601.26	1581.26	1554.06	1584.62	1600.56	1605.45	1665.22	1687.41	1738.14	1828.64	1807.16	1836.44	1865.99	1927.85	1910.79	1957.27	1972.97	2000.23	1966.2
2002-11-07	5	20	1	0	1464.52	1454.98	1454.99	1422.61	1371.3	1374.79	1412.26	1366.13	1389.53	1330.59	1385.83	1309.32	1361.84	1314.99	1303.37	1373.65	1325.03	1316.04	1380.41	1339.2	1343.98	1388.11	1370.85	1400.92	1466.49	1493.02	1485.18	1563.3	1554.08	1522.58	1537.47	1626.8	1644.19	1696.22	1720.22	1762.47	1777.55	1797.04	1806.13	1826.89	1877.23	1900.76	1937.95	1956.65	1923.62
2002-11-08	3	14	1	0	1477.46	1468.21	1407.55	1437.81	1378.1	1440.77	1416	1373.69	1407.35	1409.28	1328.95	1370.87	1346.46	1368.59	1312.79	1317.44	1362.79	1320.9	1362.32	1389.28	1333.63	1398.45	1384.65	1436.43	1422.72	1495.58	1546.4	1560.37	1522.59	1601.69	1609.95	1661.3	1710.6	1730.65	1804.23	1819.97	1824.09	1914.24	1866.68	1885.83	1971	1989.43	1988.2	2019.54	2002.35
2002-11-09	7	19	0	0	1529.86	1493.81	1449.51	1424.67	1513.34	1480.28	1437.78	1447.85	1362.36	1426.27	1373.65	1372.64	1397.8	1350.74	1425.41	1389.28	1434.29	1384.63	1402.22	1414.87	1458.25	1376.61	1407.33	1476.6	1520.67	1439.5	1560.53	1489.22	1496.92	1528.06	1619.1	1651.72	1616.38	1714.34	1758.8	1779.73	1811.93	1794.9	1873.31	1860.84	1895.66	1868.36	1886.56	1959.1	1906.47
2002-11-10	8	17	0	0	1474.81	1454.68	1471.31	1425.12	1408.93	1361.82	1410.49	1405.45	1390.11	1383.62	1385.82	1344.69	1348.93	1355.28	1322.53	1296.65	1343.96	1410.32	1327.18	1407.78	1414.29	1355.92	1427.48	1425.44	1453.41	1456.81	1419.76	1511.05	1442.15	1519.32	1535.64	1613.12	1588.36	1602.48	1681.42	1612.93	1693.29	1654.85	1705.66	1693.93	1746.45	1775.97	1754.81	1826.05	1818.9
2002-11-11	8	22	1	0	1408.01	1418.78	1415.7	1338.35	1372.63	1314.86	1357.66	1363.61	1396.25	1322.57	1319.15	1355.73	1319.28	1287.51	1290.01	1274.2	1326.75	1340.89	1347.12	1400.46	1366.33	1424.64	1391.09	1369.66	1449.27	1488.94	1529.08	1547.03	1582.6	1558.64	1559.26	1617.29	1663.61	1744.45	1772.73	1815.48	1780.07	1858.67	1883.72	1889.74	1876.11	1932.85	1919.19	1985.04	2005.39
2002-11-12	9	18	1	0	1488.95	1422.08	1437.25	1395.45	1392.97	1369.05	1366.92	1382.21	1386.16	1365.61	1351.86	1381.94	1316.4	1334.68	1378.97	1386.9	1311.07	1370.12	1374.94	1319.17	1360.57	1418.94	1364.86	1424.12	1456.44	1491.35	1547.06	1536.61	1583.96	1542.95	1571.59	1642.93	1700.71	1710.74	1774.38	1815.89	1834.47	1844.71	1876.29	1859.25	1862.31	1948.44	1975.11	1984.49	1930.83
2002-11-13	9	18	1	0	1432.06	1425.68	1413.62	1384.42	1321.11	1380.79	1355.21	1348.27	1329.6	1336.25	1348.87	1286.61	1339.87	1285.99	1365.83	1363.66	1340.51	1363.77	1382.58	1366.19	1367.87	1348.84	1365.94	1373.47	1339.1	1318.67	1337.65	1379.01	1514.69	1522.26	1632.44	1628.81	1705.18	1729.89	1748.38	1806.95	1862.76	1885.75	1912.34	1902.48	1958.66	1976.16	2001.71	2001.18	1983.77
2002-11-14	10	16	1	0	1449.78	1466.82	1489.87	1401.44	1350.74	1405.43	1368.82	1357.99	1401.7	1312.58	1350.49	1327.03	1383.99	1341.61	1312.13	1324.17	1392.04	1351.16	1418.47	1380.21	1384.84	1338.31	1415.55	1471.78	1497.89	1494.12	1546.32	1553.42	1541.31	1587.13	1656.16	1686.25	1720.59	1772.55	1790.78	1827.85	1895.71	1885.71	1967.48	2001.54	2013.68	2079.53	2028.27	2025.65	2031.53
2002-11-15	11	14	1	0	1445.54	1470.13	1413.45	1440.96	1373.55	1452.11	1398.31	1405.92	1348.13	1385.12	1375.73	1367.41	1327.01	1339.91	1331.58	1369.92	1345.78	1405.42	1349.83	1423.19	1356.16	1426.26	1440.81	1467.56	1415.87	1522.63	1536.44	1590.24	1550.63	1595.25	1609.36	1683	1701.36	1794.53	1808.56	1876.92	1884.09	1951.86	1966.31	1981.37	2011.95	2019.68	2072.58	2095.74	2086.79
2002-11-16	4	16	0	0	1530.83	1528.39	1521.15	1402.11	1406.87	1421.89	1409.56	1396.86	1366.59	1418.5	1326.48	1364.66	1362.87	1353.25	1357.11	1363.81	1388.86	1382.59	1317.61	1399.49	1346.02	1405.41	1388.8	1438.34	1413.84	1435.26	1490.35	1459.31	1515.85	1583.05	1573.47	1622.51	1658.03	1706.41	1745.49	1781.16	1773.72	1806.96	1772.66	1847.43	1813.47	1825.24	1876.49	1925.94	1871
2002-11-17	1	12	0	0	1445.59	1480.62	1449.16	1525.69	1418.38	1391.51	1421.36	1397.32	1426.24	1382.65	1387.89	1352.57	1356.82	1410.31	1401.74	1369.26	1355.93	1395.25	1349.04	1396.15	1419.98	1430.26	1354.4	1454.36	1380.9	1450.35	1421.95	1490.68	1508.43	1478.55	1539.75	1540.58	1581.63	1681.17	1673.4	1676.9	1688.11	1797.16	1819.54	1842.05	1841.6	1879.41	1884.61	1909.68	1924.39
2002-11-18	4	13	1	0	1486.8	1461.24	1454.45	1460.7	1361.24	1345.96	1395.01	1410.37	1399.22	1365.87	1338.01	1368.24	1362.15	1423.57	1347.35	1386.2	1339.34	1391.47	1365.57	1341.58	1348.21	1399.22	1404.37	1395.4	1438.55	1470.47	1505.46	1550.19	1546.31	1550.62	1580.49	1632.27	1732.24	1863.98	1910.67	1913.57	1926.58	1956.55	1983.92	2016.25	2036.44	2064.45	2068.86	2139.15	2115.02
2002-11-19	7	11	1	0	1518.42	1547.12	1478.25	1482.11	1506.03	1469.81	1453.07	1441.34	1371.93	1362.12	1399.41	1394.9	1376.27	1405.76	1424.69	1408.62	1362.72	1432.49	1424.55	1449.9	1416.06	1424.77	1540	1517.41	1530.83	1571.11	1632.87	1616.97	1620.3	1647.23	1624.96	1752.82	1775.18	1856.58	1882.04	1983.9	2013.73	2060.49	2064.55	2033.82	2055.97	2104.83	2139.71	2156.11	2136.51
2002-11-20	10	12	1	0	1488.3	1521.24	1518.32	1475.9	1459.51	1457.73	1469.81	1408.09	1418.27	1457.01	1401.65	1347.73	1373.72	1463.13	1452.29	1426.06	1418.65	1419.3	1447.19	1426.65	1431.81	1467.67	1447.37	1483.35	1555.38	1577	1583.4	1567.41	1658.41	1657.08	1689.27	1714.92	1839.38	1844.34	1939.81	1940.63	1987.81	2042.54	2065.53	2097.89	2079.18	2153.33	2144.55	2221.74	2179.7
2002-11-21	5	14	1	0	1538.97	1544.55	1513.1	1453.8	1515.85	1455.76	1412.7	1472.44	1456.74	1457.46	1440.87	1420.87	1421.59	1367.07	1367.32	1414.76	1410.03	1417.96	1443.59	1428.69	1432.54	1425.42	1429.21	1495.24	1460.7	1548.94	1586.62	1617.14	1569.84	1647.61	1673.71	1770.59	1841.16	1898.18	1906.91	1981.45	2008.13	2061.78	2074.35	2106.83	2113.96	2126.78	2154.73	2187.36	2140.71
2002-11-22	6	13	1	0	1569.41	1536.89	1514.68	1479.11	1483.65	1462.53	1428.1	1471.22	1383.44	1379.96	1399.97	1421.09	1424.76	1431.32	1429.69	1427.14	1430.33	1435.38	1385.59	1442.84	1403.75	1416.57	1453.1	1530.52	1508.14	1525.24	1557.81	1610.52	1605.07	1717.87	1710.11	1694.93	1777.95	1875.25	1948.23	1936.06	2015.51	1999.11	2061.36	2087.3	2108.53	2094.86	2103.79	2159.13	2166.66
2002-11-23	6	12	0	0	1557.7	1551.68	1552.33	1495.11	1508.41	1458.13	1450.51	1451.14	1472.74	1431.94	1443.66	1441.69	1409.13	1453.95	1444.06	1410.38	1419.08	1415.98	1373.48	1386.6	1471.04	1464.57	1463.95	1477.32	1483.38	1573.02	1560.56	1543.34	1515.83	1605.45	1650	1612.27	1713.17	1749.71	1803.96	1772.8	1830.91	1839.92	1888.79	1883.67	1910.67	1988.52	2052.79	2036.92	2053.95
2002-11-24	5	12	0	0	1557.17	1517.4	1538.48	1530.56	1431.45	1443.67	1441.38	1448.04	1439.5	1369.09	1435.42	1407.09	1370.58	1402.32	1428.07	1351.04	1398.81	1391.45	1405.64	1365.77	1413.69	1370.22	1431.02	1439.78	1479.24	1474.23	1486.18	1496.41	1522.71	1506.19	1580.19	1609.82	1625.76	1672.63	1767.38	1783.32	1804.02	1815	1832.05	1865.88	1889.59	1973.73	2024.84	2015.91	2057.68
2002-11-25	4	13	1	0	1462.93	1503.97	1455.74	1514.4	1480.92	1448.63	1392.34	1393.58	1359.53	1387.24	1353.12	1346.94	1398.2	1402.94	1371.21	1425.14	1360.36	1397.02	1398.84	1431.95	1372.66	1397.67	1445.11	1465.21	1525.74	1586.39	1540.03	1576.63	1603.32	1645.42	1637.88	1720.89	1829.61	1870.45	1940.29	1999.8	2073.34	2109.5	2127.46	2179.54	2196.92	2240.75	2240.74	2246.27	2219.97
2002-11-26	4	13	1	0	1596.19	1552.8	1503.14	1485.08	1461.51	1499.38	1434.37	1490.1	1489.27	1405.78	1380.15	1419.32	1405.39	1388.19	1443.12	1441.64	1456.33	1389.34	1437.91	1435.74	1386.62	1409.34	1440.24	1504.05	1553.47	1579.21	1621.05	1604.91	1659.82	1694.8	1658.36	1743.96	1849.08	1902.4	1987.92	1952.43	1986.42	2035.21	2093.16	2098.06	2068.4	2118.19	2136.8	2181.92	2118.62
2002-11-27	0	13	1	0	1523.54	1487.52	1494.14	1533.01	1461.92	1455.11	1539.86	1464.21	1482.31	1430.96	1390.72	1386.79	1460.04	1432.64	1433.26	1442.28	1442.97	1450.6	1467.65	1431.83	1453.36	1425.33	1474.03	1459.88	1547.61	1529.25	1585.51	1639.03	1622.67	1666.42	1697.82	1773.85	1874.62	1936.41	1991.74	2039.89	2073.67	2077.23	2065.17	2135.63	2129.17	2162.09	2185	2200.45	2212.02
2002-11-28	4	15	1	0	1513.23	1578.7	1542.63	1567.53	1553.29	1496.68	1499.33	1499.19	1449.64	1479.4	1483.39	1450.42	1425.82	1428.07	1480.21	1465.21	1417.52	1420.82	1441.29	1430.6	1408.63	1424.69	1459.21	1494.85	1531.34	1571.44	1566.07	1633.4	1605.27	1661.79	1656.4	1788.21	1825.83	1892.98	1946.66	1959.71	1954.88	2032.95	2056.35	2047.51	2038.74	2073.76	2123.59	2093.67	2165.72
2002-11-29	6	16	1	0	1526.68	1561.65	1521.28	1441.25	1498.53	1503.54	1449.68	1475.05	1407.44	1457.71	1486.73	1417.05	1432	1408.64	1395.75	1438.32	1377.84	1434.09	1449.13	1430.42	1468.7	1440.57	1522.98	1513.43	1546.28	1607.92	1611.23	1674.45	1635.15	1659.48	1718.54	1766.72	1826.18	1869.97	1889.31	1904.01	2004.71	1976.32	2043.53	2034.28	2080.4	2085.23	2075.4	2059.25	2107.82
2002-11-30	7	17	0	0	1540.87	1555.03	1487.65	1554.88	1450.29	1472.06	1441.32	1456.53	1395.87	1416.74	1407.64	1418.66	1412.11	1472	1429.37	1406.39	1407.11	1396.82	1453.48	1479.55	1477.28	1484.71	1431.48	1463.1	1492.55	1519.55	1514.95	1563.83	1568.6	1567.8	1579.08	1613.49	1653.46	1752.49	1785.31	1773.97	1851.23	1826.26	1895.98	1946.5	1963.01	1936.83	1997.15	2025.96	2045.07
2002-12-01	9	17	0	0	1451.99	1472.85	1401.08	1457.64	1432.07	1427.3	1417.99	1387.88	1373.5	1395.63	1413.01	1418.25	1345.38	1400.48	1389.97	1410.52	1393.78	1418.28	1414.5	1381.99	1367.89	1479.71	1442.87	1479.05	1507.9	1514.96	1579.51	1572.67	1634.29	1573.5	1664.44	1667.89	1780.16	1836.57	1841.8	1896.72	1878.24	1972.79	2012.36	2021.68	1979.09	2045.15	2072.91	2105.94	2107.74
2002-12-03	7	14	1	0	1494.95	1451.24	1491.99	1425.83	1434.17	1380.13	1401.68	1364.31	1380.94	1360.21	1417.52	1373.91	1332.04	1378.38	1418.11	1370.11	1389.29	1421.49	1381.31	1326.18	1341.61	1352.07	1395.51	1370.93	1392.69	1489.92	1508.34	1529.82	1557.67	1563.03	1569.48	1636.46	1708.28	1765.41	1863.08	1891.7	1920.94	1983.47	2011.61	2001.34	2065.89	2053.83	2098.89	2094.11	2123.53
2002-12-04	8	14	1	0	1538.63	1513.67	1497.81	1533.67	1432.94	1448.22	1403.46	1462.9	1401.8	1429.67	1437.18	1419.38	1393.6	1482.56	1386.75	1370.94	1491.87	1377.1	1408.9	1402.6	1482.73	1446.64	1456.58	1481.52	1517.79	1558.35	1579.59	1620.4	1628.57	1606.21	1629.88	1727.3	1756.24	1786.49	1863.29	1948.56	2004.35	1997.01	2006.12	1987.04	2065.15	2061.26	2123.93	2127.32	2084.79
2002-12-05	11	13	1	0	1570	1534.31	1456.74	1419.63	1450.76	1486.45	1431.44	1432.92	1380.99	1448.12	1408.85	1410.72	1373.25	1404.1	1407.97	1406.5	1366.52	1418.33	1364.78	1437.86	1407.58	1403.59	1413.69	1498.38	1446.76	1554.05	1594.23	1602.07	1593.46	1689.77	1681.15	1720.97	1805.53	1840.74	1889.75	1915.35	1967.7	1961.65	2034.71	2087.41	2084.79	2156.01	2143.32	2192.31	2147.83
2002-12-06	6	10	1	0	1625.32	1606.76	1645.94	1614.35	1602.72	1550.56	1561.79	1585.65	1524.98	1548.05	1546.85	1550.13	1499.07	1531.19	1557.29	1553.9	1519.74	1540.63	1528.99	1569.71	1535.36	1553.16	1528.65	1577.03	1605.77	1591.07	1704.42	1697.56	1717.22	1712.04	1728.71	1841.97	1847.21	1927.33	2029.84	2012.75	2100.12	2115.83	2081.67	2157.42	2141.27	2222.93	2206.05	2276.01	2303.46
2002-12-07	-1	6	0	0	1528.16	1537.16	1508.95	1532.82	1473.93	1418.88	1507.73	1394.29	1465.49	1442.11	1432.67	1493.45	1377.81	1423.52	1384.73	1426.83	1438.02	1374.39	1418.76	1400.77	1401.8	1438.66	1391.99	1445.26	1465.1	1501.14	1487.96	1477.03	1545.07	1524.4	1553	1648.3	1649.29	1775.4	1834.23	1879.33	1912.48	1920.42	1969.48	2037.46	2034.68	2067.96	2130.91	2094.39	2169.41
2002-12-08	-2	6	0	0	1574.99	1555.65	1563.82	1468.63	1508.21	1492.72	1493.92	1455.55	1481.28	1453.09	1423.03	1423.78	1433.28	1415.97	1342.15	1429.46	1433.87	1443.59	1394.52	1433.33	1479.31	1456.24	1418.4	1440.06	1455.13	1499.5	1469.23	1524.21	1552.37	1594.52	1620.67	1645.32	1701.13	1751.65	1758.88	1809.47	1830.83	1863.09	1889.2	1934.66	1942.73	2004.66	2024.43	2113.35	2117.74
2002-12-09	-3	5	1	0	1580.01	1523.76	1562.32	1511.55	1545.12	1453	1493.66	1498.11	1423.62	1420.96	1400.1	1421.47	1420.79	1462.29	1415.95	1464.36	1441.04	1401.2	1461.36	1419.87	1477.8	1487.29	1488.13	1490.9	1554.72	1558.55	1657.29	1686.59	1713.74	1669.53	1782.68	1827.19	1900.46	1989.04	2133.85	2167.88	2224.79	2265.48	2298.85	2346.31	2376.85	2415.47	2430.81	2438.25	2477.27
2002-12-10	-2	6	1	0	1649.64	1649.77	1616.26	1630.33	1610.14	1615.65	1529.04	1584.69	1506.92	1552.45	1526.51	1582.68	1570.5	1585.96	1523.03	1519.9	1507.16	1470.34	1476.36	1528.45	1479.03	1544.77	1547.84	1564.05	1557.22	1658	1681.9	1731.37	1711.41	1752.39	1801.73	1874.05	1928.81	2068.77	2157.71	2200.63	2250.62	2215.55	2283.81	2311.05	2323.97	2319.65	2348.4	2367.83	2371.06
2002-12-11	0	8	1	0	1667.03	1663.78	1570.03	1618.33	1577.76	1536.56	1560.96	1557.93	1552.13	1525.27	1469.6	1516.23	1503.12	1483.02	1456.83	1513.2	1502.64	1439.08	1503.84	1447.08	1525.78	1543.29	1493.57	1581.33	1541.66	1643.71	1694.11	1695.07	1735.72	1764.48	1766.5	1827.37	1915.45	2087.55	2118.04	2193.7	2237.46	2266.54	2227.04	2279.59	2313.52	2329.54	2369.43	2363.59	2356.42
2002-12-12	1	10	1	0	1602.99	1544.86	1585.99	1538.91	1539.24	1508.7	1523.23	1467.16	1422.34	1497.66	1457.4	1459.65	1426.28	1510.29	1438.86	1491.77	1497.33	1504.01	1463.91	1476.76	1451.44	1514.78	1518.73	1516.86	1549.54	1618.99	1655.57	1727.32	1731.41	1765.67	1795.77	1831.67	1959.88	2057.04	2139.45	2193.38	2177.02	2252.14	2219.98	2293.55	2310.74	2284.01	2306.14	2379.77	2332.38
2002-12-13	-1	10	1	0	1642.85	1605.34	1601.73	1595.64	1565.43	1511.94	1493.15	1545.19	1533.15	1443.96	1443.7	1452.98	1483.95	1501.69	1414.36	1454.04	1485.12	1471.12	1493.21	1488.11	1435.91	1507.68	1530.66	1547.33	1585.62	1564.11	1694.56	1718.14	1682.12	1701.24	1739.22	1811.26	1952.36	2015.4	2111.32	2175.92	2221.17	2194.02	2260.8	2283.19	2308.2	2273.78	2292.86	2314.58	2377.84
2002-12-14	1	12	0	0	1652.36	1611.4	1612.61	1556.76	1506.5	1550.19	1476.06	1470.91	1519.9	1446.92	1493.53	1408.13	1412.92	1452.22	1473.71	1487.46	1504.28	1505.94	1481.94	1447.46	1501.26	1450.85	1515.78	1536.5	1538.37	1556.46	1624.37	1582.38	1615.97	1656.54	1644.39	1754.15	1754.63	1846.05	1922.74	1950.49	1993.51	1944.51	2028.85	1984.87	2077.89	2021.86	2099.6	2108.52	2109.86
2002-12-15	6	12	0	0	1602.37	1591.39	1561.88	1506.35	1508.79	1498.83	1416.11	1467.69	1462.11	1452.11	1425.3	1405.58	1433.24	1408.94	1455.64	1407.39	1394.44	1413.51	1464.83	1448.2	1469.42	1445.27	1426.28	1481.87	1489.18	1518.23	1482.83	1535.25	1498.8	1547.86	1567.1	1651.13	1656.94	1706.76	1734.35	1827	1815.98	1837.32	1873.23	1944.03	1909.03	1966.52	1961.76	1972.87	1972.66
2002-12-16	6	13	1	0	1526.23	1488.83	1518.13	1467.27	1473.19	1476.08	1435.24	1440.64	1430.84	1443.94	1427.34	1417.84	1415.41	1437.39	1418.7	1374.16	1432.69	1406.27	1412.92	1438.56	1466.57	1492.19	1474.57	1445.89	1525.03	1604.51	1582.07	1672.77	1623.23	1700.8	1764.3	1815.93	1928.35	2016.59	2038.88	2105.46	2189.06	2194.72	2252.39	2293.58	2225.74	2325.63	2373.1	2356.19	2409.64
2002-12-17	2	8	1	0	1604.98	1612.69	1550	1534.97	1575.87	1490.05	1536.92	1481.05	1507.15	1491.82	1459.23	1441.71	1433.8	1503.72	1502.52	1478.03	1485.84	1473.11	1518.04	1463.4	1527.21	1542.69	1502.74	1497.89	1529.58	1645.41	1674.09	1726.59	1733.65	1759.56	1830.67	1818.42	1970.53	2080.14	2171.5	2154.77	2245.51	2297.04	2307	2323.14	2317.16	2402.76	2443.97	2466.3	2475.44
2002-12-18	4	6	1	0	1609.55	1621.12	1597.81	1533.17	1555.36	1493.72	1525.33	1513.74	1518.71	1465.59	1476.42	1486.37	1430.5	1486.3	1498.4	1441.15	1465.88	1470.64	1510.55	1437.22	1493.69	1500.48	1473.63	1568.91	1564.51	1632.5	1609.96	1685.08	1698.57	1717.09	1739.02	1755.65	1882.75	2042.16	2113.29	2165.14	2172.41	2218.55	2261.18	2346.67	2323.48	2385.98	2414.33	2428.78	2453.47
2002-12-19	4	7	1	0	1526.77	1546.79	1492.35	1468.6	1480.49	1412.46	1428.74	1394.47	1394.78	1381.82	1371.32	1379.66	1355.77	1403.66	1378.68	1365.12	1361.79	1385.8	1389.66	1406.89	1365.81	1382.14	1398.86	1414.91	1436.52	1487.05	1524.72	1566.91	1617.51	1565.82	1583.89	1630.73	1753.81	1931.96	2002.01	2091.22	2101.4	2140.06	2171.38	2198.82	2214.64	2250.5	2175.03	2298.78	2310.71
2002-12-20	6	9	1	0	1588.7	1561.38	1521.65	1487.35	1482.63	1439.51	1436.76	1413.72	1451.71	1417.4	1445.13	1442.34	1444.1	1392.5	1422.91	1413.82	1393.16	1438.02	1395.34	1421.06	1439.58	1476.41	1472.96	1482.3	1521.61	1602.34	1570.15	1614.2	1638.59	1687.54	1738.79	1790.73	1895.64	1992.84	2078.84	2116.47	2192.44	2200.27	2206.25	2299.13	2341.48	2336.99	2365.87	2423.04	2406.38
2002-12-21	8	10	0	0	1628.87	1615.02	1615.71	1565.83	1554.8	1532.78	1543.19	1518	1477.62	1525.76	1529.51	1483.97	1483.55	1491.47	1457.42	1466.54	1421.3	1411.08	1408.57	1458.65	1418.24	1441.94	1466.72	1442.69	1514.47	1493.22	1500.79	1547.52	1570.15	1598.09	1637.37	1679.71	1709.85	1810.06	1823.26	1946.28	1929.13	2027.11	2039.27	2033.2	2107.64	2097.6	2169.64	2178.21	2240.86
2002-12-22	7	9	0	0	1666.59	1640.19	1584.51	1553.16	1462.39	1498.23	1506.4	1492.12	1432.31	1434.96	1394.92	1425.63	1433.53	1410.18	1461.68	1413.84	1430.06	1484.4	1425.59	1462.21	1415.3	1434.78	1479.24	1417.75	1504.94	1515.71	1464.43	1485.74	1549.43	1571.01	1546.58	1598.13	1705.04	1731.43	1770.15	1826.81	1811.5	1904.92	1895.27	1966.89	1983.23	1995.53	2062.93	2068.14	2094.9
2002-12-23	1	7	1	0	1517.22	1475.34	1535.45	1445	1467.41	1442.57	1410.7	1373.28	1431.93	1426.47	1447.41	1397.79	1436.92	1400.37	1452.39	1443.99	1460.28	1375.3	1469.05	1432.92	1460.1	1409.29	1518.66	1468.29	1538.36	1534.38	1603.47	1585.75	1625.07	1718.98	1708.5	1832.36	1881.31	2045.7	2095.42	2188.36	2287.42	2306.41	2279.36	2339.67	2382.04	2439.75	2477.13	2525.51	2521.78
2002-12-24	-1	4	1	0	1640.61	1596.42	1561.52	1582.44	1572.98	1538.34	1524.04	1519.34	1456.92	1509.33	1442.45	1469.95	1443.48	1506.41	1480.95	1528.17	1510.99	1486.75	1438.34	1525.6	1524.46	1491.43	1565.49	1576.8	1517.62	1619.27	1621.7	1687.24	1720.97	1697.51	1764.83	1809.29	1925.05	2058.16	2228.32	2185.97	2289.7	2287.24	2393.63	2413.48	2383.84	2430.15	2413.88	2474.74	2448.27
2002-12-25	-2	2	1	0	1712.27	1695.13	1682.71	1595.99	1601.88	1599.49	1581.36	1552.45	1556.05	1551.89	1493.21	1463.87	1529.22	1541.28	1520.35	1524.36	1455.33	1538.21	1529.81	1522.9	1500.63	1540.59	1508.47	1545.33	1597.18	1671.32	1687.3	1707.81	1796.24	1820.44	1842.93	1919.66	2011.22	2157.44	2274.52	2330.55	2329.56	2375.88	2391.92	2437.22	2408.06	2452.35	2468.6	2490.62	2524.95
2002-12-26	-5	2	1	0	1754.66	1713.31	1708.99	1687.57	1645.25	1624.81	1575.99	1550.53	1560.51	1580.9	1556.97	1548.15	1491.53	1539.84	1548.43	1572.41	1582.73	1496.03	1562.3	1607.37	1532.3	1570.15	1604.74	1621.14	1595.18	1664.39	1743.17	1768.45	1757.57	1841.75	1880.14	1801.67	1931.27	2004.65	2176.08	2263.29	2315.74	2349.79	2444.25	2422.95	2428.14	2498.69	2411.96	2466.61	2435.63
2002-12-27	-4	2	1	0	1655.36	1629.44	1608.4	1592.56	1590.9	1564.92	1550.03	1559.45	1537.83	1528.46	1506.47	1507.15	1509.27	1477.5	1499.95	1529.92	1555.5	1546.11	1548.32	1495.22	1498.41	1555.6	1515.92	1600.08	1563.8	1653.5	1701.51	1728.98	1779.76	1786.6	1798.51	1755.87	1906.14	2135.47	2203.92	2279.83	2265.5	2321.37	2372.96	2355.94	2403.83	2425.44	2356.55	2391.76	2405.78
2002-12-29	0	5	0	0	1726.95	1708.62	1618.83	1604.48	1555.64	1611.79	1581.08	1566.56	1544.96	1525.41	1522.09	1482.59	1543.22	1570.71	1514.51	1496.03	1510.82	1490.28	1523.79	1567.67	1487.77	1510.48	1549.76	1592.32	1525.07	1593.88	1640.99	1579.07	1654.5	1634.84	1684.8	1746.68	1781.21	1866.88	1947.67	1999.52	1994.32	2088.17	2124.89	2193.52	2136.63	2206.77	2236.46	2242.18	2268.25
2002-12-30	-1	7	1	0	1616.6	1597.96	1575.31	1640.25	1518.66	1539.01	1574.07	1474.05	1458.17	1502.52	1467.62	1477.1	1463.88	1533.14	1514.82	1504.14	1486.55	1487.67	1502.8	1453.94	1459.84	1507.54	1497.67	1516.69	1582.06	1579.83	1655.88	1743.52	1702.84	1754.87	1758.73	1880.84	1956.31	2050.8	2165.85	2196.31	2260.14	2252.91	2310.79	2350.41	2378.11	2372.79	2379.17	2432.46	2398.3
2002-12-31	-1	8	1	0	1712.49	1715.31	1652.78	1637.64	1575.04	1549.33	1570.15	1503.89	1533.83	1580	1486.1	1541.38	1485.64	1497.72	1477.22	1514.67	1496.64	1557.64	1560.18	1508.01	1546.08	1572.46	1536.76	1607.47	1636.69	1693.86	1731.56	1713.03	1707.03	1737.39	1758.99	1911.82	1952.01	2113.6	2244.38	2281.58	2262.28	2305.41	2397.52	2410.11	2400.85	2377.01	2404.71	2468.41	2479.81
2003-01-01	-3	5	1	1	1726.36	1680.97	1695.19	1709.87	1597.71	1675.79	1580.52	1662.87	1629.12	1546.26	1604.75	1548.07	1547.39	1584.72	1552.08	1522.39	1579.12	1541.48	1558.78	1553.18	1487.32	1524.68	1496.7	1508.46	1513.91	1574.66	1560.46	1612.57	1624.7	1619.52	1677.62	1725.05	1779.58	1791.73	1800.68	1900.93	1892.21	1918.06	1959.96	1975.09	1954.83	1983.92	2011.3	2114.93	2060.87
2003-01-02	0	4	1	0	1616.14	1658.69	1641.13	1558.12	1571.94	1511.81	1548.25	1541.14	1497.64	1522.85	1480.41	1530.6	1550.68	1500.35	1464.14	1491.34	1523.1	1539.57	1452.66	1496.24	1500.99	1473.38	1547.66	1498.83	1584.76	1586.55	1710.79	1701.25	1742.34	1757.33	1796.55	1878.28	1942.38	2058.82	2136.93	2183.48	2282.74	2314.96	2364.18	2405.98	2450.24	2493.97	2489.29	2485.75	2560.16
2003-01-03	-1	2	1	0	1710.19	1710.1	1653.13	1687.1	1622.41	1600.46	1554.08	1596.56	1523.3	1491.84	1478.66	1475.72	1520.29	1587.87	1489.98	1554.61	1520.35	1524.53	1557.06	1500.52	1566.56	1525.8	1522.08	1549.51	1587.71	1664.19	1724.89	1760.93	1783.06	1797.3	1807.6	1958.97	2054.67	2205.61	2275.53	2331.29	2318.99	2406.21	2447.9	2483.15	2530.94	2511.67	2547.47	2566.86	2604.42
2003-01-04	-8	1	0	0	1766.99	1766.43	1754.86	1730.25	1674.94	1655.01	1631.78	1592.38	1623.03	1553.05	1578.88	1528.52	1576.31	1611.23	1592.64	1591.63	1551.94	1544.83	1570.73	1578.62	1563.17	1568.32	1564.67	1632.72	1621.67	1618.63	1720.58	1711.97	1675.06	1711.78	1758.5	1829.35	1880.63	1942.07	2013.41	2085.75	2163.94	2213.24	2242.92	2287.53	2267.44	2290.14	2357.69	2350.63	2379.56
2003-01-05	-7	2	0	0	1818.12	1736.25	1747.62	1696.58	1657.59	1689.63	1686.19	1589.44	1613.38	1582.36	1615.98	1577.44	1611.65	1583.2	1631.31	1577.37	1566.82	1590.73	1598.24	1579.96	1578.22	1565.7	1630.53	1589.12	1658.91	1692.22	1652.31	1699.11	1640.96	1735.77	1817.99	1796.24	1931.26	2013.23	2025.73	2054.78	2175.07	2213.44	2251.36	2236.38	2298.82	2337.2	2312.14	2387.83	2382.61
2003-01-06	-4	2	1	0	1735.64	1753.99	1692.66	1675.78	1691.86	1641.11	1646.73	1570.56	1623.34	1567.28	1587.33	1530.9	1604.05	1520.83	1589.43	1518.85	1603.31	1580.62	1607.74	1597.29	1614.8	1574.3	1641.96	1633.49	1711.98	1666.54	1782.08	1814.55	1858.3	1821.3	1901.03	1985.97	2126.92	2250.04	2329.88	2382.97	2475.77	2494.81	2534	2534	2624.4	2548.77	2591.28	2627.51	2678.05
2003-01-07	-3	3	1	0	1843.43	1770.62	1744.7	1735.97	1668.93	1719.51	1642.12	1626.91	1643.78	1695.18	1607.62	1658.73	1610.24	1671.16	1612.66	1619.92	1605.22	1650.88	1660.96	1674.2	1641.91	1619.57	1684.22	1715.95	1677.72	1788.85	1856.17	1820.88	1894.22	1915.84	1949.55	1974.84	2126.89	2290.36	2328.65	2344.55	2399.79	2489.36	2520.75	2506.61	2517.38	2540.51	2614.98	2592.06	2656.18
2003-01-08	-4	5	1	0	1789.05	1820.9	1783.68	1749.71	1677.72	1735.1	1690.6	1698.06	1634.97	1649.94	1651.76	1640.46	1648.5	1580.54	1623.15	1623.79	1648.93	1643.04	1671.46	1635.12	1602.33	1603.74	1636.41	1684.78	1708.92	1714.87	1824.13	1862.18	1860.32	1893.98	1887.5	1955.76	2110.87	2245.07	2292	2340.74	2428.06	2466.74	2492.82	2503.45	2500.44	2504.82	2529.48	2541.88	2554.96
2003-01-09	-3	8	1	0	1797.11	1757.43	1744.16	1659.5	1689.62	1680.03	1611.27	1643.57	1633.48	1596.24	1626.08	1558.56	1604.47	1604.48	1617.04	1653	1608.64	1604.73	1651.84	1608	1619.72	1618.22	1702.51	1610.19	1657.25	1764.28	1799.06	1830.86	1878.74	1853.99	1904.72	2012.38	2101.64	2265.88	2339.44	2368.37	2455.04	2481.64	2512.24	2461.69	2501.72	2523.76	2542.15	2587.99	2604.15
2003-01-10	0	7	1	0	1746.3	1743.59	1679.37	1709.16	1650.91	1617.9	1652.37	1613.2	1633.59	1652.11	1607.91	1554.2	1581.22	1557.11	1606.74	1562.55	1560.6	1588.71	1617.94	1619.38	1590.61	1599.56	1623.17	1700.72	1716.6	1778.71	1782.79	1812.63	1823.6	1866.89	1915.66	1966.03	2089.87	2206.01	2252.18	2379.47	2439.57	2391.51	2475.04	2501.52	2493.89	2534.21	2526.46	2597.21	2584.33
2003-01-11	-1	10	0	0	1753.96	1730.23	1760.6	1731.35	1659.94	1713.93	1673.99	1623.45	1581.63	1588.66	1644.68	1607.92	1604.33	1609.59	1564.95	1602.99	1578.31	1534.57	1619.8	1561.23	1600.65	1566.86	1609.62	1676.83	1655.54	1626.17	1729.97	1719.95	1725.55	1732.87	1741.9	1839.98	1881.08	2036.42	2047.39	2144.18	2150.98	2187.49	2258.53	2233.23	2261.66	2288.56	2275.91	2271.28	2333.24
2003-01-12	0	11	0	0	1739.88	1735.14	1659.45	1665.52	1634.71	1559.51	1603.35	1565.06	1582.45	1529.61	1515.93	1506.47	1554.97	1504.46	1557.71	1576.4	1571.44	1520.14	1487.32	1576.03	1590.64	1612.33	1564.47	1600.18	1629.1	1604.7	1617.83	1630.99	1662.83	1632.06	1747.14	1776.18	1843.03	1834.98	1895.19	1976.42	2012.53	2055.95	2052.83	2095.59	2127.71	2075.93	2085.45	2163.97	2209
2003-01-13	-2	14	1	0	1607.45	1623.94	1597.67	1607.15	1580.92	1536.71	1515.93	1469.6	1509.64	1509.14	1515.97	1494.62	1528.87	1514.68	1475.63	1525.29	1506.82	1467.14	1500.88	1512.29	1567.62	1552.74	1494.53	1604.85	1592.94	1652.45	1693.55	1692.8	1741.5	1784.64	1800.9	1820.87	2010.64	2028.73	2184.97	2262.04	2258.56	2340.04	2294.74	2375.05	2283.48	2371.1	2360.15	2377.9	2420.68
2003-01-14	1	8	1	0	1615.19	1591.17	1677.87	1577.81	1587.9	1508.48	1575.94	1602.03	1523.68	1514.25	1460.03	1510.85	1516.03	1472.99	1473.79	1492.3	1508.19	1471.1	1526.78	1511.29	1498.28	1563.94	1537.35	1597.74	1624.79	1676.16	1640.55	1771.24	1715.39	1790.48	1830.15	1867.39	1926.31	2050.02	2129.04	2181.86	2216.72	2266.12	2295.31	2330.95	2370.82	2431.59	2439.96	2394.45	2455.59
2003-01-15	-2	11	1	0	1708.21	1628.37	1668.24	1621	1607.09	1548.13	1549.72	1552.49	1563.73	1594	1490.82	1588.11	1490.07	1502.88	1540.44	1532.86	1502.63	1542.89	1508.94	1518.99	1557.69	1494.13	1586.69	1541.47	1631.24	1675.64	1686.19	1717.96	1742.86	1784.76	1873.97	1944.95	2007.69	2091.04	2188.37	2292.97	2305.93	2335.38	2414.45	2378.91	2319.86	2406.91	2403.45	2415.46	2469.46
2003-01-17	0	13	1	0	1691.6	1669.85	1627.97	1633.01	1538.43	1574	1560.19	1564.01	1556.36	1475.72	1470.73	1521.61	1531.2	1516.36	1544.47	1524.64	1491.83	1512.65	1555.41	1498.66	1551.41	1579.96	1568.49	1620	1617.47	1686.03	1629.71	1738.73	1688.49	1742.86	1824.78	1839.66	1977.46	2057.56	2161.18	2141.57	2252.17	2285.39	2275.6	2275.29	2232.96	2243.13	2291.67	2296.69	2338.35
2003-01-18	0	12	0	0	1662.82	1664.02	1613.8	1621.44	1595.38	1541.46	1585.8	1530.91	1527.53	1558.86	1524.06	1472.8	1474.63	1522.81	1475.94	1545.38	1489.97	1513.73	1478.7	1502.02	1493.74	1480.82	1507.37	1587.4	1565.53	1622.61	1612.29	1576.88	1604.35	1640.3	1727.71	1749.07	1819.28	1931.77	1985.23	1997.73	2070.58	2100.17	2095.49	2118.32	2106.48	2180.82	2173.6	2214.72	2181.77
2003-01-19	1	11	0	0	1623.28	1579.83	1552.23	1575.29	1504.12	1512.43	1528.35	1501.63	1454.62	1490.58	1518.65	1473.55	1445.84	1495.56	1473	1482.7	1457.42	1539.48	1505.46	1454.28	1532.55	1553.34	1522.44	1489.9	1537.79	1535.98	1517.29	1553.67	1629.88	1617.91	1610.9	1671.81	1787.6	1842.66	1895.23	1928.48	1910.49	2023.62	1980.95	2036.47	2051.72	2050.7	2134.93	2095.98	2122.52
2003-01-20	-1	9	1	0	1588.17	1594.62	1533.75	1536.26	1538.39	1511.58	1512.97	1511.35	1472.7	1485.53	1468.94	1406.18	1461.94	1491.73	1511.6	1463.71	1460.35	1518.83	1483.2	1462.18	1350.95	1352.81	1383.4	1493.03	1510.75	1528.56	1596.02	1647.1	1682.81	1734.37	1817.29	1850.39	1938.54	2063.89	2135.55	2214.62	2259.74	2346.25	2343.12	2363.22	2354.94	2347.33	2435	2459.11	2460.54
2003-01-21	0	10	1	0	1644.65	1606.9	1559.96	1631.5	1590.43	1591.69	1616.4	1603.56	1572.19	1595.19	1535.08	1575.18	1539.79	1474.96	1489.14	1498.54	1534.88	1494.34	1513.63	1547.85	1495.79	1530.18	1570.57	1579.8	1601.49	1607.91	1631.54	1681.43	1681.68	1757.38	1790.65	1884	1955.78	2112.14	2104.64	2208.7	2268.75	2330.35	2321.4	2333.27	2363.09	2338.55	2323.49	2341.88	2411.52
2003-01-22	-2	7	1	0	1612.86	1629.41	1605.27	1566.4	1538.03	1516.39	1574.36	1509.45	1535.11	1494.31	1486.6	1476.71	1515.61	1441.6	1497.99	1450.06	1529.51	1506.33	1444.47	1519.33	1519.44	1450.42	1472.16	1538.62	1541.93	1549.91	1599.52	1608.5	1652.73	1722.61	1730.87	1799.2	1896.46	2048.13	2120.83	2208.55	2210.79	2248.83	2312.53	2343.47	2347.04	2396.95	2400.78	2433.28	2412.63
2003-01-23	0	9	1	0	1663.4	1661.24	1626.65	1650.27	1603.12	1560.09	1586.34	1531.48	1521.93	1518.03	1516.96	1528.22	1563.64	1486.18	1501.13	1540.12	1498.74	1506.65	1498.27	1494.5	1548.49	1600.53	1584.83	1537.9	1561.64	1633.48	1679.33	1653.32	1696.48	1742.84	1824.69	1901.83	1966.19	2042.48	2120.45	2158.61	2221.65	2257.89	2313.31	2278.07	2296.84	2323.8	2326.5	2346.82	2375.23
2003-01-24	4	10	1	0	1671.03	1695.32	1621.61	1627.3	1540.99	1573.16	1595.89	1527.47	1557.05	1541.44	1511.3	1549.65	1525.79	1511.66	1566.82	1548.85	1495.09	1525.01	1513.81	1517.88	1574.53	1520.91	1549.07	1509.8	1580.33	1555.19	1606.93	1681.86	1722.27	1779.33	1779.25	1863.89	1949	2061.95	2116.4	2179.6	2197.31	2244.7	2273.31	2238.44	2258.94	2288.96	2365.31	2311.53	2367.11
2003-01-26	0	6	0	0	1661.58	1665.89	1606.22	1638.54	1543.37	1511.03	1525.51	1490.37	1475.25	1441.98	1481.64	1495.44	1462.08	1506.72	1436.66	1493.52	1430.81	1475.44	1512.59	1464.89	1483.57	1473.5	1479.96	1486.22	1436.89	1548.14	1559.14	1524.93	1542.46	1581.31	1595.95	1689.72	1688.83	1763.1	1844.19	1908.58	1908.5	1961.05	1969.35	2023.18	2023.03	2098.69	2052.61	2117.75	2091.39
2003-01-27	-3	4	1	0	1563.71	1568.81	1584.06	1583.34	1568.99	1532.37	1520.69	1524.46	1550.99	1485.36	1457.16	1508.79	1508.97	1511.49	1512.79	1422.45	1423.77	1437.61	1483.95	1474.82	1470.33	1475.44	1504.04	1513.22	1484.9	1541.74	1593.19	1605.43	1626.44	1717.8	1764.29	1801.04	1889.96	2014.15	2095.83	2142.3	2217.96	2206.14	2265.27	2266.06	2320.3	2327.2	2338.33	2306.56	2412.03
2003-01-28	-4	5	1	0	1668.63	1596.39	1613.09	1577.09	1511.28	1542.24	1545.72	1574.73	1554.84	1494.79	1464.17	1512.57	1485.88	1560.35	1473.63	1537.54	1508.31	1485.5	1450.35	1538.77	1509.81	1486.19	1485	1502.01	1574.62	1565.73	1542.65	1580.21	1695.53	1729.76	1747.54	1742.71	1851.05	1980.68	2001.01	2063.58	2107.43	2135.45	2161.35	2177.38	2187.65	2211.61	2206.4	2178.29	2183.43
2003-01-29	-3	7	1	0	1575.88	1572.74	1518.07	1521.35	1484.83	1460.6	1457.09	1495.65	1429.01	1469.72	1485.72	1449.76	1412.65	1477.63	1442.33	1480.49	1402.09	1406.19	1471.73	1471.1	1497.12	1486.38	1500.29	1492.03	1481.51	1530.83	1543.04	1580.27	1552.98	1646.62	1688.4	1746.27	1783.67	1875.46	1970.53	1951.85	1972.89	2037.71	2046.05	2017.36	2067.37	2074.6	2101.4	2112.44	2122.97
2003-01-30	2	6	1	0	1551.4	1543.53	1548.44	1547.65	1488.62	1473.16	1420.39	1457	1455.72	1418.09	1458.52	1438.02	1436.41	1432.75	1375.94	1388.77	1459.92	1380.47	1446.16	1385.53	1429.64	1363.31	1443.12	1438.99	1469.81	1412.07	1446.64	1518.5	1535.11	1503.92	1631.6	1636.41	1681.16	1755.61	1857.98	1909.47	1919.23	1936.26	1990.43	1935.97	1955.17	2019.58	2006.76	2062.83	1989.64
2003-01-31	1	3	1	0	1541.89	1454.79	1474.12	1455.12	1360.48	1384.45	1337.84	1310.25	1319.96	1289.35	1328.18	1284.05	1311.59	1326.06	1361.18	1366.9	1287.25	1349.09	1297.66	1309.92	1335.57	1352.12	1384.4	1313.78	1302.14	1387.77	1363.24	1399.58	1362.1	1405.84	1457.71	1497.02	1585.34	1631.56	1667.89	1700.55	1741.88	1799.21	1789.91	1782.72	1809.36	1817.89	1843.62	1795.91	1855.48
2003-02-01	-1	5	0	1	1672.22	1583.16	1529.95	1526.22	1449.89	1368.79	1376.74	1349.53	1279.06	1314.46	1276.61	1263.08	1263.91	1265.26	1199.59	1192.32	1254.31	1230.28	1239.27	1179.91	1252.75	1236.27	1248.07	1275.4	1258.82	1222.99	1265.14	1205.9	1248.2	1229.95	1307.59	1307.47	1363.97	1406.08	1418	1459.69	1413.42	1489.83	1459.43	1529.33	1544.03	1573.65	1599.8	1612.55	1538.54
2003-02-02	0	8	0	1	1350.97	1334.68	1355.05	1303.29	1327.01	1244.24	1274.56	1246.79	1207.78	1257.18	1269.5	1229.59	1275.56	1249.13	1247.52	1208.18	1273.06	1237.44	1236.16	1240.72	1220.39	1267.19	1219.47	1218.04	1237.78	1231.1	1267.52	1220.89	1261.56	1260.66	1369.15	1327.85	1380.27	1357.42	1440.28	1449.22	1463.29	1453.32	1463.94	1461.79	1510.46	1481.45	1508.23	1506.95	1527.31
2003-02-03	1	10	1	1	1373.51	1366.88	1338.06	1312.83	1247.25	1293.92	1241.51	1295.97	1245.51	1250	1195.84	1229.86	1154.5	1205.01	1177.93	1233.33	1186.37	1215.56	1265.94	1244.73	1231.69	1262.9	1248.02	1286.91	1246.04	1213.69	1265.8	1221.46	1279.41	1249.27	1341.29	1310.32	1377.83	1409.85	1367.87	1436.41	1464.94	1442.46	1510.71	1547.28	1557.11	1512.46	1548.74	1576.08	1597.57
2003-02-04	8	20	1	1	1392.63	1352.57	1320.19	1309.64	1315.85	1273.79	1282	1265.11	1212.46	1211.33	1165.27	1232.76	1207.04	1219.93	1179.83	1157.91	1198.07	1237.11	1184.22	1223.86	1255.82	1176.86	1199.35	1211.09	1203.05	1207.04	1232.8	1255.7	1209.33	1287.21	1269.56	1390.98	1356.49	1419.41	1391.87	1473.84	1518.64	1463.65	1541.73	1521.23	1546.14	1516.2	1570.72	1631.69	1625.28
2003-02-05	-1	9	1	1	1455.65	1385.77	1393.73	1369.04	1347.95	1331.88	1321.19	1313.78	1250.29	1202.31	1253.61	1240.13	1231.41	1176.96	1243.24	1267.08	1259.19	1237.58	1196.52	1230.93	1258.46	1255.55	1235.44	1198.97	1269.98	1211.82	1275.24	1215.26	1228.24	1321.59	1341.55	1374.67	1404.79	1404.1	1460.63	1482.41	1474.63	1550.73	1537.09	1612.79	1553.33	1574.1	1591.02	1652.69	1613.43
2003-02-06	-2	10	1	1	1403.32	1351.71	1414.55	1320.11	1270.03	1254.6	1309.68	1296.03	1322.49	1277.03	1245.22	1211.69	1227.7	1227.24	1272.48	1308.85	1268.94	1238.17	1277.02	1277.51	1278.71	1244.25	1273.16	1304.4	1322.18	1264.68	1267.75	1334.03	1356.57	1391.85	1340.65	1358.54	1414.79	1437.26	1503.19	1507.72	1525.47	1565.17	1572.66	1574.03	1633.07	1594.2	1647.45	1681.98	1641.03
2003-02-07	2	8	1	1	1385.49	1361.06	1383.99	1385.81	1346.25	1281.5	1294.98	1319.1	1317.2	1261.65	1227.33	1275.13	1296.37	1276.6	1267.98	1298.91	1312.5	1336.03	1252.9	1286.18	1295.03	1269.04	1307.79	1308.58	1313.09	1288.96	1366.09	1337.66	1301.67	1364.55	1342.28	1411.28	1402.64	1508.65	1506.47	1562.79	1559.02	1612.12	1650.95	1634.71	1644.48	1670.28	1693.54	1726.31	1742.47
2003-02-08	6	12	0	0	1433.19	1385.59	1415.5	1350.93	1354.82	1342.21	1316.31	1354.62	1328.45	1300.67	1307.11	1226.26	1277.39	1242.97	1243.9	1300.23	1299.57	1328.02	1291.51	1302.75	1290.4	1321.44	1286.15	1338.97	1334.82	1361.13	1398.08	1379.35	1420.88	1461.77	1514.84	1548.61	1578.55	1703.53	1743	1823.05	1801.42	1859.33	1912.52	1960.65	1903.45	1996.54	1964.31	2020.41	2004.76
2003-02-09	6	14	0	0	1474.06	1457.51	1460.5	1408.11	1387.22	1332.39	1339.62	1332.43	1369.07	1325.51	1361.98	1327.1	1370.48	1339.58	1359.37	1357.99	1364.98	1323.17	1361.69	1338.2	1383.17	1380.46	1390.49	1372.84	1354.23	1415.55	1439.27	1454.13	1424.93	1514.05	1487.21	1612.73	1594.43	1725.19	1722.45	1805.53	1805.97	1807.24	1812.68	1838.86	1873.29	1900.7	1885.25	1958.28	1926.77
2003-02-10	3	6	1	0	1437.89	1489.38	1431.53	1466.64	1411.56	1335.66	1423.6	1321.69	1368.39	1369.24	1341.08	1317.46	1339.38	1276.53	1356.81	1339.38	1350.22	1354.75	1323.67	1349.09	1373.81	1368.78	1412.87	1427.95	1414.53	1420.56	1431.68	1472.21	1483.78	1536.08	1578.05	1652.1	1728.45	1873.21	1894.61	2022.75	1978.63	2039.2	2078.07	2165.08	2166.88	2234.26	2272.88	2307.61	2322.81
2003-02-11	-3	2	1	0	1624.55	1589.23	1560.89	1595.71	1582.88	1562.78	1563.3	1480.85	1493.3	1534.35	1541.85	1515.74	1417.77	1418.87	1419.7	1430.12	1460.59	1419.62	1446.73	1460.61	1465.41	1445.18	1526.39	1499.2	1539.86	1542.37	1533.97	1597.91	1636.34	1625.85	1691.89	1803.08	1847.4	1952.67	2038.01	2095.33	2170.16	2171.04	2205.15	2309.41	2168.98	2242.66	2227.86	2373.92	2362.57
2003-02-12	-4	5	1	0	1591.83	1602.94	1634.04	1627.28	1542.7	1510.13	1514.52	1483.49	1485.68	1431.57	1496.77	1476.52	1450.75	1489	1436.79	1499.49	1493.3	1447.33	1490.78	1476.6	1475.33	1472.74	1474.34	1494.26	1545.44	1534.15	1586.51	1604.31	1614.59	1672.89	1702.85	1788.17	1854.48	2019.16	2112.07	2179.77	2176.93	2206.56	2266	2268.76	2271.15	2337.09	2357.65	2363.5	2364.39
2003-02-13	-1	7	1	0	1695.64	1617.34	1655.38	1610.6	1558.01	1561.65	1528.33	1543.11	1516.42	1443.72	1462.06	1477.33	1421.58	1437.08	1493.71	1503.43	1438.31	1456.08	1503.36	1504	1461.38	1460.22	1501.44	1506.34	1493.39	1561.45	1574.37	1605.9	1639.01	1639.17	1733.2	1765.31	1930.95	2045.18	2128.18	2135.96	2191.61	2254.82	2281.35	2277.66	2320.64	2343.59	2348.61	2385.57	2391.26
2003-02-14	4	6	1	0	1615.56	1648.89	1579.48	1576.67	1584.85	1522.7	1533.51	1557.68	1473.52	1516.28	1465.13	1486.14	1455.3	1489.68	1524.24	1494.2	1473.9	1458.58	1499.14	1449.95	1486.65	1544.11	1533.2	1476.96	1537.15	1564.91	1525.92	1541.33	1627.06	1668	1722.71	1741.96	1932.96	2007.96	2115.24	2129.9	2204.64	2225.66	2249.67	2323.22	2335.4	2334.04	2364.63	2429.46	2425.4
2003-02-15	3	6	0	1	1669.66	1656.69	1589.04	1602.11	1622.37	1617.65	1549.04	1567.39	1529.89	1542.05	1536.55	1480.31	1454.58	1470.83	1485.84	1469.88	1502.46	1461.48	1471.89	1453.94	1503.07	1520.04	1451.84	1481.47	1439.28	1510.97	1509.02	1536.34	1497.87	1552.8	1533.99	1594.88	1667.42	1795.34	1796.67	1842.71	1901.02	1924.94	1948.62	2010.34	2041.46	2075.67	2072.5	2093.58	2186.8
2003-02-16	5	7	0	0	1601.59	1622.13	1583.71	1532.84	1474.37	1471.84	1489.58	1466.98	1398.46	1459.46	1459.94	1432.97	1440.56	1412.27	1397.56	1416.89	1439.39	1430.56	1466.43	1448	1389.23	1409.94	1411.02	1405.45	1504.7	1464.94	1504.49	1508.23	1493.78	1548.1	1571.81	1592.91	1627.45	1703.8	1746.59	1857.38	1912.89	1942.27	1917.55	1966.14	2013.26	2034.94	2069.68	2034	2066.94
2003-02-17	2	13	1	0	1638.72	1608.39	1590.84	1516.24	1494.12	1504.68	1438.84	1474.21	1401.3	1474.34	1442.52	1462.08	1408.33	1397.73	1431.18	1451.51	1461.97	1418.82	1409.84	1398.32	1454.88	1442.88	1470.16	1490.91	1542.21	1522.41	1582.66	1612.21	1680.62	1727.26	1782.73	1765.25	1885.61	2038.29	2116.68	2095.9	2192.08	2268.66	2291.06	2286.33	2313.42	2287.85	2332.81	2347.06	2392.45
2003-02-18	4	13	1	0	1647.5	1629.72	1600.86	1520.96	1520.68	1540.97	1455.37	1514.89	1472.1	1425.07	1467.3	1487.09	1479.47	1427.71	1446.22	1494.62	1476.2	1460.3	1486.08	1462.71	1484.46	1464.48	1436.21	1491.49	1533.98	1511.86	1630.65	1620.01	1619.89	1674.07	1677.1	1771.37	1862.9	1997.93	2049.32	2051.06	2139.2	2199.08	2208.53	2179.3	2186.2	2262.77	2317.73	2328.22	2295.99
2003-02-19	3	12	1	0	1551.49	1535.53	1556.39	1517.35	1479.01	1467.57	1508.99	1441.79	1453.96	1456.25	1453.76	1444.2	1453.06	1421.94	1476.94	1416.95	1421.69	1486.8	1448.72	1492.49	1417.66	1495.26	1510.72	1505.12	1550.25	1646.63	1640.77	1677.99	1685.02	1655.37	1676.87	1788.62	1852.18	1980.31	1983.33	2087.87	2051.8	2094.29	2126.3	2176.8	2108.19	2165.7	2237.92	2164.4	2244.05
2003-02-20	3	17	1	0	1619.95	1563.73	1570.69	1569.09	1471.14	1516.67	1499.41	1484.37	1289.32	1439.41	1448.76	1409.78	1439.02	1494.96	1481.63	1527.41	1498.43	1478.08	1472.54	1492.7	1487.31	1496.05	1514.89	1473.81	1534.97	1651.73	1659.41	1655.93	1735.72	1678.7	1690.63	1803.82	1845.96	2006.95	2012.65	2111.42	2129.59	2118.7	2185.35	2133.31	2208.92	2183.85	2206.48	2266.09	2214.51
2003-02-21	9	16	1	0	1610.01	1582.91	1530.71	1541.14	1511.42	1529.96	1493.26	1532.06	1532.49	1462.04	1442.23	1431.37	1491.29	1447.46	1478.55	1478.75	1433.34	1457.93	1459.34	1474.59	1420.23	1488.05	1491.91	1479.12	1503.32	1600.73	1625.49	1671.04	1625.19	1657.09	1710.1	1783.21	1818.02	1938.41	1932.17	1940.62	1990.64	2047.55	2059.81	2087.58	2064.08	2079.98	2152.35	2180.5	2223.9
2003-02-22	7	12	0	0	1575.69	1510.79	1554.78	1550.65	1444.74	1477.38	1475.28	1410.91	1413.54	1451.68	1436.55	1440.85	1441.47	1418.27	1386.62	1427.55	1408.74	1451.94	1435.13	1469.34	1465.53	1436.87	1471.38	1476.72	1488.52	1471.02	1514.73	1548.84	1528.58	1537.02	1628.4	1693.74	1685.77	1738.1	1854.19	1865.96	1875.53	1942.85	1947.81	1974.07	2050.98	2068.7	2059.49	2115.55	2154.79
2003-02-23	4	10	0	0	1528.87	1549.02	1564.18	1503.77	1493.18	1428.71	1461.64	1458.32	1389.46	1390.3	1408.67	1426.91	1369.45	1414.54	1424.59	1462.34	1459.89	1389.92	1406.81	1392.98	1409.4	1394.92	1414.34	1424.31	1423.33	1451.24	1453.33	1473.56	1519.81	1565.02	1579.99	1653.16	1720.81	1724.99	1772.04	1849.14	1887.21	1938.2	1953.88	1940.33	2002.55	1989.51	2026.66	2058.97	2088.25
2003-02-24	2	13	1	0	1521.67	1534.16	1512.83	1534.97	1471.44	1454.37	1447.69	1455.52	1488.29	1437.39	1487.74	1469.34	1456.82	1480.68	1486.04	1418.56	1441.39	1463.28	1473.61	1476.8	1425.55	1474.87	1526.76	1506.64	1530.09	1565.34	1652.44	1653.68	1633.42	1658.6	1689.18	1776.72	1858.29	1982.07	2012.44	2034.56	2098.1	2109.08	2150.63	2189.27	2156.55	2191.68	2186.89	2223.58	2243.22
2003-02-25	8	14	1	0	1573.18	1621.56	1624.96	1554.08	1504.63	1574.38	1560.84	1480.18	1536.15	1502.4	1487.31	1440.11	1525.21	1499.87	1479.44	1493.05	1465.09	1439.74	1471.12	1461.98	1505.17	1470	1521.01	1527.03	1590.5	1567.63	1670.68	1678.84	1688.8	1713.54	1743.66	1753.65	1879.22	1934.58	2075.77	2053.8	2123.82	2119.78	2191.1	2167.6	2209.27	2175.19	2244.43	2250.68	2221.79
2003-02-26	9	12	1	0	1558.26	1546.15	1492.93	1480.08	1539.01	1479.56	1544.33	1516.16	1447.46	1477.73	1412.24	1417.64	1431.06	1492.98	1493.45	1455.47	1417.95	1447.51	1472.58	1470.69	1414.58	1517.64	1458.75	1568.86	1497.27	1586.52	1673.67	1664.53	1671.86	1647.58	1729.95	1789.07	1820.88	1996.62	2001.04	2041.97	2053.87	2134.55	2184.99	2162.1	2175	2263.46	2225.97	2294.11	2354.6
2003-02-27	6	10	1	0	1606.98	1620.51	1545.58	1623.05	1585.56	1543.47	1585.84	1589.21	1505.7	1528.84	1508.9	1512.89	1510.97	1504.39	1444.69	1496.18	1469.57	1489.33	1486.32	1539.4	1498.57	1506.88	1514.5	1574.33	1533.95	1641.67	1691.85	1742.54	1703.02	1720.06	1752.44	1844.83	1927.48	2004.68	2104.91	2154.5	2213.38	2225.21	2242.85	2306.88	2324.99	2324.86	2321.17	2403.25	2443.77
2003-02-28	6	8	1	0	1631.4	1636.21	1583.58	1602.85	1627.21	1564.91	1589.6	1539.44	1546.69	1505.36	1545.68	1493.23	1559.34	1474.84	1519.55	1457.4	1469.28	1489.84	1505.16	1456.9	1525.88	1513.51	1483.99	1499.48	1566.66	1660.55	1619.48	1716.64	1724.38	1727.19	1804.6	1853.3	1959.21	1984.26	2068.2	2162.41	2200.45	2255.13	2289.59	2313.97	2293.63	2307.13	2342.62	2361.96	2416.06
2003-03-01	4	14	0	0	1705.56	1660.58	1637.77	1581.76	1604.22	1621.29	1551.52	1554.46	1548.16	1552.45	1539.64	1558.58	1498.67	1528.69	1555.18	1517.65	1477.23	1493.52	1506.89	1532.28	1499.37	1529.19	1556.66	1558.42	1497.17	1575.16	1552.08	1603.36	1564.5	1621.62	1644.43	1758.26	1743.98	1843.54	1834.06	1871.78	1926.83	1956.92	1972.72	1996.66	2028.76	2055.34	2102.42	2107.4	2111.46
2003-03-02	5	12	0	0	1642.56	1634.85	1560.86	1643.05	1586.59	1542.1	1583.49	1552.36	1573.42	1594.3	1521.45	1547.72	1527.33	1514.21	1509.16	1493.06	1550.99	1465.39	1517.95	1521.21	1473.43	1518.84	1509.19	1557.87	1512.39	1586.96	1593.55	1538.08	1567.17	1652.51	1679.25	1729.57	1760.44	1806.51	1776.74	1894.49	1921.7	1914.43	1928.06	1983.4	1960.96	2024.46	2048.36	2084.21	2065.25
2003-03-03	3	9	1	0	1575.54	1577.97	1549.62	1536.91	1571.54	1509.03	1498.08	1478.53	1516.01	1473.72	1523.18	1493.48	1531.88	1459.56	1499.34	1481.39	1428.37	1499.4	1425.13	1478.35	1497.87	1499.52	1539.03	1504.57	1547.03	1539.59	1676.71	1634.44	1674.4	1751.41	1772.97	1851.91	1922.38	2095.81	2185.13	2239.78	2206.64	2304.79	2293.36	2342.15	2400.88	2369.5	2403.83	2456.28	2481.77
2003-03-04	8	20	1	0	1691.27	1699.61	1658.16	1651.73	1567.35	1574.66	1578.7	1613.36	1570.52	1501.21	1539.09	1508.41	1515.78	1500.89	1576.71	1569.21	1549.38	1489.09	1546.7	1545.5	1494.44	1566.7	1576.6	1586.65	1577.69	1663.63	1714.27	1798.5	1743.76	1808.98	1825.84	1911.97	1983.48	2145.25	2168.38	2259.26	2297.47	2379.06	2397.4	2353.11	2424.76	2452.15	2482.45	2483.39	2464.7
2003-03-05	-1	4	1	0	1654.49	1702.88	1675.68	1656.43	1587.25	1556.86	1533.45	1559.1	1505.84	1575.88	1535.08	1558.43	1492.42	1572.38	1588.53	1586.67	1566.02	1534.53	1499.66	1539.08	1496.99	1544.44	1573.18	1579.2	1557.51	1646.1	1701.62	1707.42	1772.04	1751.16	1831.05	1863.3	1968.95	2171.62	2252.94	2290.6	2304.69	2383.47	2407.42	2417	2428.73	2463.72	2474.69	2551.3	2526.65
2003-03-06	1	5	1	0	1684.2	1625.52	1658.16	1591.29	1583.53	1610.99	1608.3	1535.85	1566.73	1570.24	1567.76	1495.67	1501.22	1547.53	1545.36	1505.23	1537.49	1546.55	1522.21	1478.81	1498.33	1544.23	1510.82	1573.71	1550.6	1596.08	1647.3	1704.47	1714.48	1774.51	1809.97	1900.75	1961.09	2094.61	2209.16	2242.31	2339.91	2340.35	2373.89	2405.09	2412.03	2430.96	2451.06	2522.25	2533.56
2003-03-07	0	8	1	0	1676.99	1698.62	1644.62	1673.35	1578.78	1620.03	1605.18	1552.12	1534.43	1553.55	1534.16	1500.83	1542.49	1477.89	1510.53	1517.89	1561.68	1504.81	1504.57	1524.33	1565.46	1522.1	1575	1577.14	1584.48	1628.76	1733.39	1780.4	1780.46	1739.81	1819.99	1918.28	1967.31	2123.61	2159.44	2237.29	2225.06	2298.56	2321.43	2364.4	2336.58	2395.61	2371.01	2455.11	2402.08
2003-03-08	3	13	0	0	1727.32	1717.91	1706.8	1653.44	1626.9	1587.75	1602.12	1516.34	1547.84	1502.65	1476.83	1498.91	1538.97	1570.86	1567.57	1523.48	1500.28	1555.54	1541.62	1555.58	1492.51	1551.75	1569.33	1586.24	1585.37	1614.92	1645.52	1622.72	1681.81	1685.14	1670.42	1711.46	1765.43	1865.65	1932	1961.31	1989.1	2022.93	2036.69	2007.34	2076.21	2039.37	2055.91	2054.47	2072
2003-03-09	4	14	0	0	1652.02	1620.34	1607.27	1525.89	1498.92	1547.38	1546.39	1501.99	1496.53	1487.14	1480.78	1423.28	1462.46	1468.8	1497.03	1492.79	1498.32	1494.69	1439.17	1452.9	1487.19	1489.78	1467.65	1482.43	1524.64	1544.63	1510.39	1558.85	1552.93	1634.63	1632.74	1712.45	1754.56	1744.45	1770.32	1867.51	1912.59	1874.65	1950.24	1983.78	1933.97	1936.06	1981.04	2037.25	2019.26
2003-03-10	4	14	1	0	1593.3	1600.06	1567.74	1514.69	1464.38	1506.49	1500.3	1499.37	1431.93	1473.35	1483.53	1460.12	1463.62	1401.37	1501.18	1469.44	1504.9	1497.05	1442.88	1463.95	1514.38	1450.9	1546.96	1546.34	1576.86	1572.49	1658.83	1721.18	1725.55	1803.37	1797.09	1796.01	1927.35	2059.04	2094.02	2165.6	2116.46	2194.65	2197.88	2216.26	2212.3	2298.45	2254.52	2319	2318.75
2003-03-11	6	11	1	0	1586.81	1641.83	1613.08	1579.94	1623.19	1528.06	1618.74	1534.14	1496.74	1522.9	1580.5	1477.9	1480.71	1488.77	1520.18	1489.34	1483.72	1536.7	1470.54	1564.1	1523.13	1577.88	1499.45	1551.42	1578.89	1603.67	1699.23	1657.44	1724.95	1757.28	1784.28	1839.52	1944.6	2026.98	2060.81	2140.03	2110.28	2136.77	2237.74	2215.61	2229.35	2261.96	2284.39	2320.4	2297.7
2003-03-12	9	12	1	0	1598.73	1619.81	1624.07	1595.69	1504.55	1527.09	1527.57	1557.98	1474.98	1508.15	1501.46	1520.18	1473.5	1454.13	1484.33	1500.47	1483.94	1434.48	1495.34	1559.57	1475.99	1532.46	1523.66	1534.31	1612.11	1616.67	1689.13	1696.44	1733.15	1753.59	1755.59	1824.51	1955.14	2015.41	2019	2110.65	2124.12	2124.88	2224.96	2159.17	2227.97	2301.72	2261.79	2329.41	2328.46
2003-03-13	7	12	1	0	1616.9	1607.6	1555.56	1536.82	1567.99	1497.75	1519.37	1524.65	1495.12	1532.16	1468.25	1510.68	1522.13	1523.43	1468.93	1499.91	1443.75	1453.27	1537.08	1537.78	1483.08	1524.1	1581.24	1566.18	1591.97	1646.44	1641.86	1756.93	1711.81	1714.43	1804.17	1786.31	1970.78	2005.74	2054.07	2099.41	2161.79	2183.78	2215.49	2215.03	2277.21	2256.37	2293.47	2341.46	2326.35
2003-03-14	7	10	1	0	1662.78	1643.6	1630.09	1564.87	1574.26	1526.55	1546.28	1494.16	1533.91	1523.53	1468.05	1535.01	1511.65	1534.42	1512.79	1551.54	1483.97	1544.82	1467.26	1507.74	1514.9	1560.81	1570.07	1531.43	1518.49	1614.84	1641.9	1697.76	1728.75	1752.39	1777.99	1830.27	1941.84	2034.13	2099.88	2167.95	2200.27	2218.85	2229.3	2320.53	2329.33	2345.12	2368.28	2418.36	2429.41
2003-03-15	4	8	0	0	1682.44	1664.25	1670.81	1660.25	1553.91	1563.33	1522.04	1564.93	1498.93	1546.47	1455.06	1486.66	1541.25	1544.74	1555.6	1493.99	1564	1499.5	1518.29	1499.63	1521.6	1517.01	1515.27	1549.66	1567.07	1616.05	1584.07	1653.84	1681.29	1610.68	1720.75	1764.22	1783.26	1829.4	1908.92	1935.44	1982.47	2014.97	2031.54	2097.54	2137.48	2168.39	2161.62	2206.12	2247.24
2003-03-16	6	9	0	0	1709.38	1671.23	1634.99	1627.2	1553.72	1567.02	1549.69	1519.53	1463.32	1523.26	1529.29	1541.63	1507.22	1468.67	1503.97	1541.63	1508.91	1475.07	1546.09	1527.72	1485.65	1509.04	1524.78	1528.83	1541.58	1521.1	1572.8	1582.72	1622.04	1624.56	1680.09	1734.1	1718.02	1822.6	1902.63	1933.89	1975.48	1997.27	2059.63	2096.78	2055.52	2144.64	2156.77	2213.02	2211.45
2003-03-17	3	7	1	0	1579.1	1601.76	1527.13	1581.02	1528.21	1492.86	1527.01	1547.12	1510.81	1556.87	1530.12	1469.29	1492.19	1517.8	1559.59	1453.27	1508.96	1475.36	1556.8	1486.86	1526.85	1522.66	1528.02	1489.68	1594.81	1600.69	1679.43	1732.03	1792.83	1795.18	1831.14	1881.56	1999.69	2129.49	2155.42	2237.95	2276.46	2362.18	2390.45	2455.02	2477.98	2500.33	2542.35	2533.72	2576.26
2003-03-18	4	11	1	0	1698.51	1643.33	1681.86	1597.62	1636	1611.87	1596.37	1575.47	1588.54	1539.93	1558.3	1602.04	1509.66	1522.43	1524.91	1541.83	1513.28	1550.29	1556.43	1565.92	1548.32	1566.8	1567.24	1564.44	1598.89	1653.91	1711.02	1776.48	1748.89	1786.68	1807.87	1870.8	1974.92	2050.42	2084.49	2170.7	2137.69	2202.79	2164.47	2199.45	2269.75	2271.13	2315.65	2251.84	2359.56
2003-03-19	6	12	1	0	1622.48	1643.46	1648.23	1568.74	1548.22	1501.86	1541.92	1491.62	1516.17	1511.88	1443.02	1473.78	1517.64	1448.21	1532.26	1474.8	1522.45	1515	1509.68	1502.37	1541.84	1485.83	1558.62	1596.47	1633.56	1634.08	1673.5	1746.99	1706.58	1728.09	1804.37	1810.59	1911.62	2002.49	2035.82	2110.48	2193.9	2166.05	2215.67	2230.94	2197.17	2228.96	2293.01	2247.72	2300.74
2003-03-20	7	15	1	0	1746.54	1743.04	1720.05	1677.73	1654.75	1647.61	1645.02	1683.53	1617.33	1639.12	1628.58	1633.4	1611.92	1634.41	1686.42	1613.07	1645.03	1641.66	1693.31	1608.89	1630.73	1683.16	1692.91	1698.63	1696.13	1780.89	1784.42	1893.55	1832.51	1887.03	1777.82	1831.31	1904.59	2028.28	2066.83	2084.62	2058.38	2119.94	2093.49	2177	2208.95	2083	2156.57	2122.28	2164.08
2003-03-21	2	13	1	0	1643.43	1608.89	1623.33	1562.66	1516.73	1583.43	1552.31	1591.52	1569.56	1518.54	1516.73	1513.34	1553.13	1465.22	1468.05	1493.88	1509.15	1503.68	1478.04	1434.33	1517.82	1491.3	1544.97	1504.67	1607.82	1626.55	1599.08	1650.36	1714.24	0	1768.23	1819.31	1857.59	1916.7	2063.79	2003.07	2070.35	2048.1	2106.46	2120.76	2148.17	2135.9	2207.72	2215.38	2219.78
2003-03-22	5	15	0	0	1602.06	1585.01	1566.77	1605.6	1569.2	1554.99	1483.84	1529.23	1495.14	1504.75	1510.78	1449.05	1487.91	1446.49	1472.51	1544.86	1514.94	1516.73	1499.34	1473.95	1442.76	1485.2	1527.47	1552.6	1514.65	1599.65	1578.33	1648.68	1616.93	1694.69	1671.65	1748.29	1729.43	1787.37	1884.95	1908.57	1879.98	1967.43	1992.42	1989.12	1984.2	2036.29	2090.94	2108.57	2111.44
2003-03-23	6	13	0	0	1663.98	1587.99	1628.19	1596.01	1471.83	1537.78	1507.78	1530.72	1509.71	1451.71	1471.4	1428.62	1454.46	1419.4	1482.63	1418.35	1474.35	1491.66	1499.23	1439.88	1485.32	1436.23	1492.21	1459.39	1559.53	1544.66	1551.53	1577.51	1582.53	1649.09	1704.28	1748.07	1697.06	1806.31	1809.06	1881.59	1912.35	1857.14	1940.3	1944.77	1939.42	1971.05	2017.32	2002.39	2020.72
2003-03-24	8	19	1	0	1511.79	1538.13	1556.61	1564.31	1428.53	1424.65	1451.78	1389.87	1418.58	1419.78	1403.23	1421.9	1438.1	1405.76	1453.41	1367.89	1452.98	1493.82	1445.59	1460.06	1467.04	1513.6	1529.64	1494.89	1547.81	1564.13	1629.46	1677.68	1741.11	1723.9	1752.31	1788.57	1855.36	1909.84	1952.03	2021.5	2007.68	2006.66	2084.42	2121.82	2058.17	2142.89	2168.56	2212.47	2184.73
2003-03-25	9	23	1	0	1566.9	1589.11	1617.24	1558.45	1566.77	1502.42	1545.7	1481.8	1575.25	1517.42	1524.17	1502.39	1490.05	1486.18	1479.8	1439.2	1490.83	1480.1	1495.9	1506.85	1489.41	1531.71	1514.34	1566.73	1571.74	1665.13	1658.74	1639.09	1729.16	1756.4	1749.91	1746.49	1827.58	1849.4	1891.52	1937.49	1966.97	1963.73	1982.45	2052.35	2018.19	2119.05	2094.45	2122.99	2128.9
2003-03-26	10	24	1	0	1608.87	1533.14	1537.72	1479.27	1464.82	1416.75	1465.19	1422	1432.22	1417.59	1407.69	1360.92	1427.21	1440.74	1459.39	1346.6	1393.59	1370.85	1423.99	1385.85	1382.45	1403.17	1457.65	1485.6	1534.75	1528.51	1592.16	1623.3	1642.23	1667.56	1609.54	1646.31	1766.2	1798.55	1819.89	1852.7	1889.82	1851.96	1924.85	1900.25	2006.02	1990.11	2014.58	1983.45	1982.89
2003-03-27	5	18	1	0	1543.75	1465.73	1449.48	1440.38	1487.57	1433.62	1469.51	1460.96	1431.78	1470.38	1469.68	1423.03	1441.2	1428.96	1443.04	1432.44	1390.99	1445.35	1419.73	1391.13	1428.97	1434.64	1417.72	1478.63	1507.5	1574.14	1557.88	1616.49	1676.73	1633.31	1680.63	1665.47	1736.31	1788.25	1842.36	1917.47	1869.1	1943.89	1978.88	1993.87	1969.84	2020.06	2077.37	2069.6	2068.92
2003-03-28	8	20	1	0	1523.47	1498.72	1446.26	1440.95	1450.12	1467.6	1396.26	1492.11	1423.05	1485.3	1427.62	1474.36	1446.47	1495.99	1440.45	1461.15	1460.53	1401.83	1469.49	1460.47	1463.33	1476.8	1479.76	1482.85	1491.76	1533.38	1626.73	1642.93	1629.98	1610.29	1620.56	1714.05	1783.88	1833.03	1864.79	1862.34	1935.44	1962.87	1983.45	1957.54	2060.59	2056.55	2065.4	2046.26	2082.43
2003-03-29	12	26	0	0	1583.87	1570.21	1560.26	1536.11	1496.45	1443.39	1490.05	1420.15	1504.33	1455.19	1449.36	1458.48	1424.71	1459.37	1412.69	1479.96	1429.73	1422.15	1468.75	1464.97	1419.2	1443.82	1469.02	1490.61	1523.11	1535.09	1535.84	1546.07	1599.22	1607.7	1647.01	1707.02	1667	1727.35	1772.13	1812.83	1802.63	1864.05	1880.87	1920.13	1957.3	1930.82	2002.36	1928.68	1967.38
2003-03-30	13	27	0	0	1485.48	1526.48	1487.29	1474.72	1398.14	1425.27	1414.89	1391.3	1360.99	1354.51	1407.11	1331.95	1384.47	1337.85	1415.9	1417.93	1355.66	1406.24	1396.81	1420.64	1370.11	1422.82	1418.61	1431.31	1421.43	1492.55	1515.88	1534.06	1556.48	1574.36	1526.87	1613.27	1599.92	1664.27	1701.27	1687.89	1749.25	1723.57	1795.64	1802.92	1850.88	1803.99	1889.26	1885.09	1926.83
2003-03-31	16	23	1	0	1505.79	1441.21	1484.11	1415.53	1417.06	1392.83	1408.24	1391.55	1333.2	1403.21	1398.59	1390.66	1317.75	1410.99	1345.83	1406.3	1352.76	1390.12	1406.27	1357.72	1426.57	1384.07	1400.42	1455.95	1518.9	1549.19	1520.65	1559.78	1608.64	1597.77	1595.98	1737.46	1783.4	1851.56	1867.53	1895.95	1915.63	1932.38	1920.66	2007	2032.24	2002.74	2085.99	2102.54	2040.82
2003-04-01	14	19	1	0	1493.27	1545.73	1463.9	1492.78	1466.95	1532.94	1449.82	1435.67	1440.19	1447.43	1506.3	1457.01	1451.82	1465.08	1469.74	1384.13	1429.93	1397.21	1434.06	1487.94	1451.75	1459.69	1442.37	1460.89	1521.21	1565.21	1615.2	1619.97	1631.15	1680.87	1617.23	1704.89	1749.32	1818.53	1844.96	1859.9	1944.33	1918.03	1953.83	1982.52	2018.09	2002	2039.54	2057.99	2057.97
2003-04-02	10	16	1	0	1511.88	1513.8	1510.87	1448	1427.06	1436.37	1455.47	1419.35	1435.91	1405.7	1413.33	1394.25	1429.06	1425.94	1388.93	1378.89	1377.5	1390.54	1420.07	1404.45	1407.19	1436.89	1414.35	1462.79	1459.19	1517.98	1548.94	1573.77	1592.98	1600.58	1660.81	1694.42	1783.88	1819.62	1896.97	1925.09	1955.49	1985.91	2025.41	2030.05	2080.94	2096.32	2144.14	2176.41	2164.03
2003-04-03	10	14	1	0	1530.45	1480.76	1468.57	1509.71	1419.57	1403.3	1459.17	1427.11	1389.02	1415.27	1399.21	1370.09	1363	1343.04	1386.43	1392.43	1397.4	1393.18	1389.4	1399.52	1400.93	1405.05	1404.08	1472.73	1485.34	1520.48	1575.82	1593.81	1546.03	1569.55	1608.17	1664.25	1754.67	1834.93	1871.39	1894.92	1920.77	1993.47	1982.83	1978.26	1989.98	2034.17	2033.28	2067.47	2086.98
2003-04-04	9	16	1	0	1520.97	1517.58	1533.68	1496.65	1414.44	1405.69	1426.59	1414.99	1373.92	1395.16	1381.43	1428.67	1414.15	1358.39	1393.84	1410.42	1409.38	1411.42	1428.88	1399.94	1402.91	1399.34	1404.52	1426.91	1499.82	1556.22	1534.26	1565.87	1584.77	1609.52	1620.97	1693.58	1757.48	1822.72	1894	1878.53	1943.12	1969.64	1986.05	1976.74	2010.89	2025.8	2032.02	2053.82	2072.52
2003-04-05	9	20	0	1	1502.19	1484.04	1488.38	1478.49	1459.94	1445.6	1413.18	1442.95	1425.16	1388.77	1383.02	1405.72	1425.56	1421.26	1398.1	1419.58	1406.16	1412.8	1406.14	1402.27	1383.5	1386.6	1412.38	1462.69	1483.72	1495.06	1515.63	1505.41	1545.51	1528.68	1562.69	1607.21	1607.68	1657.2	1669.86	1724.67	1722.41	1741.61	1762.98	1822.05	1832.4	1821.64	1831.37	1856.23	1892.17
2003-04-06	14	22	0	0	1490.97	1431.07	1445.18	1415.03	1387.42	1373.2	1352.1	1361.77	1361.92	1345.85	1330.66	1347.64	1333.68	1323.72	1336.88	1355.58	1368.73	1360.39	1344.25	1377.75	1348.5	1378.8	1370.94	1424.17	1418.37	1457.35	1498.16	1473.06	1477.06	1491.42	1529.94	1546.54	1580.45	1633.46	1672.38	1700.35	1701.78	1728.11	1725.81	1736.78	1762.63	1817.84	1871.93	1883.34	1865.19
2003-04-07	14	20	1	0	1426.47	1405.58	1419.6	1392.75	1357.38	1357.89	1383.91	1317.55	1380.63	1355.08	1342.46	1290.28	1327.81	1333.27	1334.36	1317.96	1330.33	1330.03	1339.29	1335.9	1375.91	1378.45	1362.5	1377.1	1419.01	1499.64	1502.93	1533.55	1560.48	1564.21	1599.01	1654.9	1745.4	1795.43	1813.73	1878.49	1897.86	1929.7	1957.85	1981.1	2016.7	2079.49	2056.22	2083.63	2099.31
2003-04-08	13	24	1	0	1494.18	1457.84	1458.29	1436.44	1433.03	1412.62	1433.04	1393.28	1403.53	1367.17	1356.35	1392.24	1393.07	1341.64	1332.73	1374.52	1367.05	1378.05	1379.27	1395.91	1378.62	1372.44	1427.66	1454.65	1464.53	1487.12	1507.87	1534.6	1573.73	1613.52	1635.56	1662.2	1729.92	1781.19	1808.16	1852.59	1902.61	1885.4	1926.41	1943.97	1946.87	1951.11	1990.27	2009.32	1990.75
2003-04-09	12	25	1	0	1498.21	1467.17	1496.85	1457.41	1408.37	1400.69	1386.66	1392.6	1387.99	1377.18	1382.67	1401.11	1355.52	1378.36	1399.2	1381.1	1387.99	1417.78	1399.18	1381.13	1407.07	1446.58	1434.12	1423.1	1495.5	1518.67	1534.78	1576.81	1595.8	1596.46	1655.51	1679.33	1752.97	1793.8	1837.01	1855.61	1941.36	1924.42	1932.82	1957.39	1988.54	2033.69	2017.08	2028.75	2054.07
2003-04-10	9	14	1	0	1536.6	1512.56	1499.63	1464.44	1455.2	1412.79	1404.13	1402.9	1412.71	1390.92	1411.69	1367.67	1370.71	1384.69	1387.69	1372.07	1368.48	1413.03	1407.34	1431.88	1394.87	1386.91	1402.36	1426.81	1468.24	1534.89	1545.61	1571.04	1600.46	1653.36	1622.78	1707.04	1750.2	1807.25	1863.6	1935.72	1930.62	1969.03	1975.86	1995.05	2041.69	2025.97	2036.41	2058.61	2072.9
2003-04-12	11	17	0	0	1511.59	1490.98	1460.95	1451.68	1444.62	1428.42	1397.38	1433.49	1411.44	1407.74	1413	1400.83	1376.14	1358.94	1389.34	1398.49	1409.77	1408.86	1391.22	1397.68	1396.44	1396.24	1435.94	1449.05	1452.2	1503.51	1483.93	1499	1531.23	1546.97	1568.2	1610.72	1672.02	1726.65	1753.08	1797.03	1815.88	1840.65	1852.5	1891.83	1905.6	1911.38	1943.47	1959.56	1984.64
2003-04-13	14	19	0	0	1516.18	1477.57	1470.8	1463.26	1451.27	1427.39	1414.39	1394.34	1393.26	1385.14	1373.72	1388.91	1390.39	1362.16	1406.15	1371.52	1376.01	1388.22	1414.3	1415.23	1391.33	1394.93	1392.56	1403.4	1443.09	1461.92	1492.29	1512.61	1508.68	1524.46	1541.63	1591.29	1609.19	1657.29	1701.64	1731.81	1770.01	1788.24	1798.2	1821.22	1864.25	1880.78	1880.46	1938.27	1909.61
2003-04-14	10	22	1	0	1437.36	1460.29	1454.38	1419.57	1409.44	1391.91	1358.29	1370.31	1390.21	1377.62	1370.55	1351.63	1346.73	1326.51	1350.14	1350.54	1363.35	1363.8	1396.73	1362.4	1381.52	1386.81	1409.9	1476.59	1483.99	1553.47	1550.24	1573.33	1561.89	1600.55	1651.53	1670.67	1775.39	1787.57	1835.82	1834.76	1872.36	1915.38	1913.61	1954.68	1957.4	2031.03	2044.26	2056.42	2066.78
2003-04-15	10	26	1	0	1516.86	1479.3	1481.72	1488.97	1422.18	1417.22	1396.68	1389.97	1415.77	1367.71	1407.43	1390.88	1365.78	1408.32	1369.11	1406.99	1391.13	1393.13	1425.75	1399	1425.91	1416.45	1427.71	1484.05	1538.6	1523.85	1569.82	1613.22	1650.95	1625.2	1655.74	1701.89	1734.14	1791.03	1874.53	1883.23	1922.49	1942.32	1944.67	1956.01	1993.49	2026.57	2054.07	2073.68	2079.71
2003-04-16	16	28	1	0	1533.2	1490.83	1500.13	1511.84	1494.87	1485.08	1451.83	1457.59	1439.11	1415.35	1417.79	1397.64	1412.46	1412.28	1417.96	1429.14	1440.31	1444.78	1399.27	1450.46	1426.48	1407.63	1445.38	1494.95	1482.02	1546.24	1574.6	1580.5	1612.43	1598.48	1630.09	1695.96	1722.8	1806.89	1836.59	1892.11	1897.97	1912.99	1992.83	2024.17	1997.42	2018.12	2055.93	2069.08	2067.49
2003-04-17	20	30	1	0	1559.91	1521.69	1513.73	1500.73	1460.11	1432.52	1447.53	1435.31	1438.47	1416.93	1422.15	1417.03	1399.88	1369.49	1394.41	1418.86	1445.48	1444.37	1456.32	1429.77	1447.26	1431.52	1467.87	1513.67	1540.53	1563.94	1614.36	1593.9	1582.96	1629.09	1625.47	1669.84	1737.16	1813.4	1849.68	1855.49	1890.38	1928.65	1952.99	1986.24	2008.78	2017.48	2029.92	2054.49	2044.58
2003-04-18	13	21	1	0	1537.39	1587.87	1595.73	1545.18	1532.68	1532.13	1469.06	1510.47	1497.39	1447.96	1423.49	1429.9	1466.65	1454.75	1419.5	1452.22	1453.89	1435.9	1414.81	1479.41	1445.09	1473.07	1425.57	1533.19	1495.53	1563.17	1594.46	1644.24	1591.87	1653.6	1669.52	1662.81	1765.95	1823.23	1816.12	1852.08	1924.54	1951.47	1959.92	1970.33	2012.14	2042.84	2084.69	2125.21	2110.04
2003-04-19	10	15	0	0	1566.66	1522.44	1488.39	1527.53	1462.57	1469.09	1459.54	1420.95	1395.48	1444.22	1429.49	1405.29	1372.61	1377.37	1438.58	1402.69	1387.88	1383.01	1439.4	1410.45	1469.44	1478.34	1454.33	1458.64	1436.13	1529.51	1515.62	1546.6	1554.51	1538.39	1617.73	1616.09	1656.7	1708.93	1749.64	1817.17	1799.71	1878.49	1876.22	1931.33	1913.09	1974.35	2040.09	2022.2	2074.86
2003-04-20	9	16	0	0	1503.25	1501.14	1490.85	1439.75	1466.01	1387.76	1419.43	1454.35	1375.59	1376.49	1452.94	1381.36	1387.34	1390.02	1362.44	1420.93	1420.9	1422.31	1386.55	1412.14	1432.57	1430.78	1410.98	1488.46	1512.44	1500.52	1460.52	1489.49	1545.29	1547.37	1587.34	1593.68	1642.12	1677.66	1689.46	1714.08	1734.79	1742.9	1810.61	1786.57	1789.06	1825.96	1859.8	1935.14	1880.36
2003-04-21	14	19	1	0	1494.68	1469.2	1413.45	1453.18	1413.97	1451.58	1444.68	1373.12	1415.86	1372.94	1404.58	1409.38	1341.08	1378.19	1405.12	1417.8	1335.51	1412.82	1339.25	1354.9	1349.33	1416.66	1463.28	1458.44	1488.48	1514.41	1561.49	1575.35	1569.21	1572.01	1624.29	1704.84	1718.47	1831.47	1879.25	1901.35	1908.01	1926.98	1960.99	1976.83	2001.97	2022.48	2046.77	2068.2	2059.14
2003-04-22	13	21	1	0	1564.21	1515.62	1480.32	1455.01	1447.9	1454.49	1438.32	1397.56	1411.44	1413.19	1390.3	1377.31	1343.78	1401.38	1369.17	1365.84	1359.18	1376.98	1379.81	1377.32	1447.83	1390.65	1397.97	1426.93	1504.32	1492.94	1581.45	1597.96	1552.55	1582.94	1604.73	1685.54	1716.14	1760.05	1786.59	1809.44	1846.77	1926.91	1903.48	1959.34	1992.24	2017.22	2050.25	2065.55	2052.21
2003-04-23	13	19	1	0	1559.16	1530.79	1515.48	1514.63	1520.7	1462.13	1423.26	1468.51	1384.75	1462.7	1394.09	1469.62	1467.98	1390.13	1446.08	1385.94	1433.04	1406.48	1479.37	1422.31	1473.49	1440.31	1448.52	1449.2	1444.49	1580.97	1518.45	1548.18	1656.85	1624.04	1639.21	1702.08	1745.03	1761.54	1855.2	1910.71	1956.16	1953.81	1999.25	2000.01	2055.26	2058.56	2073.4	2143.86	2155.67
2003-04-24	10	14	1	0	1589.55	1542.62	1548.25	1503.46	1508.8	1481.77	1447.49	1445.96	1458.97	1468.9	1415.09	1391.02	1416.18	1418.41	1478.02	1464.77	1419.46	1510.88	1452.61	1496.52	1444.54	1483.08	1528.19	1496.71	1506.17	1580.45	1576.54	1653.83	1626.74	1668.49	1723.15	1756.31	1803.58	1873.68	1935.34	1959.33	2007.26	2027.16	2066.05	2057.38	2102.1	2182.36	2182.65	2174.14	2206.62
2003-04-25	12	18	1	0	1553.07	1535.61	1566.28	1515.85	1511.7	1454.05	1420.75	1463.69	1430.9	1474.17	1468.31	1448.79	1384.78	1405.8	1447.84	1463.75	1494.45	1418.13	1457.98	1389.06	1399.31	1480.93	1483.7	1499.49	1546.3	1512.01	1603.84	1647.33	1612.06	1673.91	1637.22	1756.95	1741.6	1866.04	1904.12	1963.78	2037.51	2038.25	2056.53	2039.6	2083.6	2068.63	2142.83	2118.5	2179.2
2003-04-26	12	24	0	0	1558.65	1581.29	1528.19	1462.54	1486.48	1454.68	1444.81	1407.78	1444.56	1471.3	1475.66	1397.62	1432.19	1388.81	1450.58	1444.21	1480.73	1471.88	1393.15	1412.51	1436.82	1399.14	1429.31	1422.92	1498.68	1543.16	1550.01	1583.79	1548.42	1596.56	1642.75	1633.63	1671.85	1781.81	1823.1	1859.69	1864.79	1880.09	1951.82	1954.51	1929.27	1941.22	1987.29	2002.99	2044.07
2003-04-27	15	25	0	0	1539.97	1486.5	1511.56	1441.96	1495.12	1458.45	1479.68	1468.23	1446.2	1486.41	1450.48	1369.92	1390.23	1473.29	1414.69	1380.2	1473.19	1372.62	1433.84	1389.5	1447.71	1399.53	1461.15	1490.7	1469.66	1457.12	1467.74	1490.8	1577.42	1600.78	1622.8	1595.22	1634.89	1726.55	1748.62	1813.62	1827.02	1848.39	1903.59	1960.99	1909.15	1951.01	1996.38	2022.36	1978.5
2003-04-28	13	18	1	0	1518.27	1511.73	1514.86	1485.38	1510.35	1400.05	1425.63	1480.6	1392.02	1473.06	1429.61	1421.51	1410.2	1412.54	1386.1	1382.31	1461.7	1422.21	1437.33	1437.69	1423.19	1404.15	1458.95	1493.36	1528.99	1521.06	1597.66	1532.42	1625.09	1574.41	1611.7	1698.58	1691.32	1793.82	1842.13	1903.18	1895.17	1912.28	1938.4	1967.98	2032.17	2057.25	2073.67	2132.59	2073.42
2003-04-29	16	18	1	0	1485.59	1488.68	1534.72	1499.71	1376.03	1394.59	1422.18	1421.8	1370.11	1403.11	1405.38	1407.78	1372.81	1406.54	1388.38	1386.04	1383.27	1373.93	1395.83	1448.56	1377.32	1449.21	1476.68	1477.42	1435.43	1492.15	1534.68	1574.19	1568.53	1529.74	1548.53	1655.69	1717.36	1768.62	1819.99	1884.45	1937	1918.62	1933.93	1951.1	1952.94	2068.01	2019.92	2096.86	2087.42
2003-04-30	13	25	1	0	1487.54	1502.96	1516.96	1524.1	1398.1	1449.53	1373.46	1411.87	1410.02	1344.87	1376.23	1404.47	1368.59	1389.24	1427.48	1419.44	1396.88	1431.97	1382.05	1425.77	1376.21	1414.37	1470.45	1496.65	1506.86	1486.19	1592.44	1552.26	1591.66	1630.22	1651.58	1698.83	1668.09	1761.26	1768.83	1841.17	1837.72	1912.17	1934.59	1948.19	1939.83	1991.52	1977.83	1969.17	1984.13
2003-05-01	14	28	1	1	1539.65	1443.31	1495.5	1490.69	1448.68	1438.89	1397.12	1435.99	1395.14	1415.95	1404.24	1396.07	1370.81	1353.35	1399.06	1314.74	1317.05	1356.16	1363.36	1337.12	1372.92	1346.54	1422.65	1417.41	1456.57	1437.86	1487.78	1538.72	1565.08	1493.4	1567.02	1526.54	1579.8	1595.57	1672.78	1611.52	1715.85	1704.54	1710.57	1739.83	1755.87	1726.92	1819.59	1832.85	1776.57
2003-05-02	15	28	1	0	1452.26	1400.66	1381.25	1385.93	1329.32	1348.06	1324.56	1324.82	1318.6	1300.42	1373.19	1262.34	1297.33	1296.09	1299.49	1340.4	1312.42	1321.14	1306.02	1378.5	1363.27	1361.22	1404.76	1430.3	1397.25	1475.18	1461.08	1425.55	1486.36	1465.8	1559.39	1525.3	1586.11	1604.47	1665.33	1684.49	1649.01	1747.69	1778.56	1740.18	1776.97	1787.35	1881.3	1831.06	1865.04
2003-05-03	19	26	0	0	1408.36	1382.24	1374.97	1387.11	1303.66	1304.19	1300.66	1287.12	1284.78	1263.08	1273.56	1283.48	1248.4	1260.64	1250.49	1290.16	1283.37	1295.51	1307.79	1282.71	1282.72	1296.39	1316.55	1336.28	1372.55	1367.14	1389.93	1418.12	1433.99	1444.68	1482.95	1526.26	1552.62	1566.56	1598.72	1662.59	1687.81	1725.59	1728.16	1749.45	1763.39	1782.75	1809.16	1860.46	1862.28
2003-05-04	18	25	0	0	1382.39	1366.36	1369.89	1352.95	1317.48	1295.36	1347.15	1343.27	1307.73	1279.23	1263.77	1340.34	1331.15	1310.73	1301.3	1348.62	1301.78	1360.3	1377.77	1388.81	1356.5	1324.18	1373.27	1356.66	1384.36	1467.9	1491.57	1458.85	1506.75	1511.38	1509.07	1564.05	1609.65	1717.73	1710.14	1808.06	1814.15	1843.89	1876.08	1840.87	1852.4	1871.29	1954.06	1975.23	1983.51
2003-05-05	18	25	1	0	1431.74	1412.45	1444	1400.11	1403.45	1371.78	1394.59	1323.28	1370.71	1309.2	1360.94	1311.15	1318.47	1359.27	1359.66	1379.6	1322.03	1383.86	1337.16	1386.44	1327.78	1358.12	1412.3	1420.34	1411.62	1446.93	1423.56	1495.47	1452.96	1533.19	1514	1608.43	1600.78	1699.64	1705.95	1715.03	1767.38	1776.67	1836.28	1860.69	1900.56	1906.82	1945.71	1972.87	1988.79
2003-05-06	18	25	1	0	1469.46	1416.16	1413.08	1453.26	1348.4	1381.74	1368.4	1345.46	1369.4	1328.4	1360.55	1324.99	1317.33	1352.42	1330.61	1387.71	1391.46	1346.16	1342.35	1384.54	1405.03	1371.94	1408.73	1423.99	1464.37	1476.05	1461.94	1539.65	1487.03	1567.92	1588.94	1628.53	1623.75	1727.8	1783.72	1829.04	1803.06	1887.79	1912.65	1911.89	1910.91	1986.25	1999.69	2050.83	2017.1
2003-05-07	21	26	1	0	1536.78	1509.66	1513.52	1488.59	1443.08	1390.14	1436.95	1433.25	1422.84	1413.66	1337.46	1411.15	1409.02	1379.75	1431.21	1421.74	1390.62	1451.11	1440.46	1442.66	1378.99	1433.92	1467.44	1433.26	1452.65	1469.92	1562.26	1543.79	1584.01	1590.64	1607.35	1624.74	1738.3	1758.78	1859.38	1850.33	1933.17	1946.19	1994.31	1945.05	2008.59	2013.03	2073.6	2058.71	2110.09
2003-05-08	13	22	1	0	1483.37	1542.34	1531.65	1522.09	1419.43	1474.66	1472.68	1462.02	1445.09	1408.18	1458.66	1394.56	1442.21	1434.68	1463.51	1400.42	1465.41	1463.17	1423.21	1450.62	1447.76	1427.15	1452.91	1450.82	1537.64	1522.64	1584.29	1625.1	1621.97	1630.19	1690.64	1667.28	1776	1832.79	1881.9	1885.57	1960.01	1966.44	1978.76	1946.9	2013.12	2037.96	2022.23	2085.92	2062.57
2003-05-09	12	22	1	0	1559.04	1526.74	1481.07	1454.19	1465.68	1431.74	1463.71	1463.42	1440.04	1460.19	1447.92	1398.86	1435.94	1420.98	1490.93	1393.49	1485.61	1467.71	1431.09	1410.97	1453.4	1464.67	1438.04	1512.59	1539.27	1539.18	1565.76	1576.76	1576.94	1664.64	1666.5	1668.88	1739.92	1776.9	1829.52	1835.89	1864.84	1893.61	1903.49	1914.85	1932.71	1989.55	2007.35	2035.04	2053.21
2003-05-10	15	23	0	0	1511.39	1468.96	1513.68	1448.95	1412.58	1401.53	1454.78	1410.57	1453.86	1434.98	1437.38	1403.78	1429.93	1380.74	1389.26	1442.78	1394.96	1441.47	1397.8	1420.31	1414.05	1404.36	1457.64	1479.89	1499.04	1461.9	1546.78	1491.4	1527.54	1593.45	1616.44	1660.5	1702.71	1700.1	1726.08	1818.98	1860.56	1859.25	1854.96	1932.06	1927.19	1935.64	2023.05	1976.02	2051.28
2003-05-11	15	25	0	0	1514.75	1470.19	1504.62	1468	1503.95	1493.19	1466.76	1475.48	1469.32	1450.66	1439.99	1437.3	1447.1	1382.34	1406.74	1445.56	1448.73	1419.54	1480.44	1424.38	1470.17	1461.57	1463.73	1477.35	1510.15	1533.89	1520.59	1574.37	1607.54	1590.49	1564.51	1559.57	1658.05	1702.12	1728.48	1714.61	1750.34	1806.14	1799.15	1874.63	1823.22	1913.52	1928.58	1960.42	1932.15
2003-05-12	17	23	1	0	1502.38	1444.52	1422.79	1498.27	1464.85	1419.97	1465.77	1400.69	1405.88	1410.47	1398.65	1427.22	1404.14	1406.09	1443.53	1390.55	1458.02	1410.5	1446.89	1375.05	1383.49	1445.62	1474.64	1452.6	1474.97	1520.68	1546.63	1579.08	1630.38	1671.79	1710.18	1738.97	1758.45	1871.78	1873.49	1962.94	1964.46	2021.25	2029.93	2046.6	2067.46	2081.53	2070.58	2122.2	2139.81
2003-05-13	17	19	1	0	1535.06	1492.14	1496.54	1531.28	1434.94	1424.24	1466.23	1485.59	1470.74	1462.57	1414.69	1463.51	1409.52	1427.2	1390.68	1372.69	1459.31	1442.44	1494.94	1450.92	1439.16	1497.16	1507.36	1524.21	1525.15	1589.04	1607.19	1569.74	1587.9	1643.94	1690.86	1699.6	1828.29	1838.8	1940.03	1895.39	1940.83	2006.09	2071.46	2025.5	2051.36	2070.07	2138.04	2097.02	2127.25
2003-05-14	16	22	1	0	1577.94	1502.26	1557.66	1557.83	1476.36	1460.6	1480.74	1425.13	1484.14	1416.16	1476.04	1407.54	1462.04	1447.55	1461.66	1461.57	1497.46	1417.37	1482.68	1470.62	1487.66	1484.49	1488.1	1520.16	1551.03	1528.17	1639.67	1654.41	1595.02	1707.75	1701.03	1778.7	1787.64	1843.39	1882.24	1917.76	1986.41	1960.05	1988.15	1992.19	1994.22	2041.89	2063.34	2113.64	2086.8
2003-05-15	16	23	1	0	1496.49	1523.01	1505.89	1493.75	1442.66	1469.82	1507.36	1386.98	1384.81	1427.38	1407.9	1412.88	1439.99	1372.81	1421.13	1451.19	1393.86	1440.73	1396.13	1402.04	1427.43	1446.22	1507.63	1490.41	1475.59	1553.65	1545.81	1588.74	1614.6	1576.4	1657.84	1685.25	1704.43	1794.48	1874.09	1842.1	1894.73	1880.21	1939.82	1924.68	1960.79	1957.68	2015.9	1996.39	2038.09
2003-05-16	19	22	1	0	1496.21	1512.02	1441.81	1487.94	1456.97	1473.76	1480.27	1394.48	1467.77	1422.36	1432.02	1404.51	1352.81	1395.45	1359.2	1361.78	1459.27	1427.98	1416.5	1377.49	1459.44	1401.9	1468.62	1489.7	1535.91	1511.36	1573.22	1613.48	1565.97	1627.94	1676.32	1699.69	1762.98	1808.1	1819.62	1874.6	1850.27	1870.32	1921.43	1910.62	1999.66	1971.18	1980.77	2090.05	2066.54
2003-05-17	17	25	0	0	1504.19	1497.46	1502.3	1512.91	1423.71	1470.64	1395.25	1447.9	1389.73	1372.87	1426.67	1431.14	1407.55	1424.85	1357.87	1419.57	1379.06	1383.79	1420.36	1472.7	1424.91	1433.33	1411.98	1497.82	1464.37	1473.22	1503.72	1555.92	1471.25	1568.95	1597.71	1610.11	1666.08	1654.58	1706.88	1766.29	1806.56	1835.67	1830.96	1828.9	1925.83	1961.4	1960.21	1927.61	1955.65
2003-05-18	18	27	0	0	1493.15	1442.81	1435.76	1481.51	1465.01	1404.27	1473.79	1458.59	1402.5	1385.99	1372.07	1424.39	1364.81	1421.69	1470.34	1405.6	1397.29	1433.1	1380.46	1409.99	1371.33	1389.91	1400.98	1444.8	1402.26	1508.87	1492.19	1554.84	1505.06	1565.56	1579.12	1610.41	1577.28	1625.66	1693.42	1757.57	1721.84	1794.88	1815.5	1765.46	1836.69	1866.97	1894.29	1915.47	1918.8
2003-05-19	19	29	1	0	1449.35	1433.54	1458.76	1439.32	1406.7	1356.51	1343.97	1315.89	1344.14	1419.74	1355.44	1398.6	1321.41	1365.62	1422.18	1408.41	1357.83	1357.43	1384.49	1429.57	1399.38	1441.68	1462.96	1532.95	1484.87	1505.22	1487.7	1582.87	1552.23	1639.86	1642.07	1727.98	1741.99	1783.7	1873.33	1883.67	1926.21	1979	1984.19	2012.18	2021.43	2092.6	2097.31	2058.21	2142.35
2003-05-20	19	29	1	0	1572.15	1524.58	1502.69	1518.6	1528.81	1479.47	1518.95	1450.39	1469.81	1430.1	1407.44	1452.29	1427.1	1374.37	1446.49	1397.1	1416.9	1470.72	1466.67	1493.66	1478.52	1486.1	1478.38	1513.25	1530.68	1545.15	1552.2	1633.69	1606.45	1656.37	1594.76	1694.64	1761.19	1839.14	1832.63	1867.64	1922.7	1946.4	1933.37	1938.96	1998.26	2005.02	2028.88	2056.79	2041.34
2003-05-21	18	26	1	0	1475.4	1532.23	1498.54	1500.66	1481.8	1458.43	1524.01	1446.32	1455.6	1489.97	1439.87	1446.89	1475.7	1459.85	1377.92	1467.96	1476.77	1434.03	1405.42	1471.62	1462.57	1426.58	1528.75	1460.22	1564.55	1528.86	1591.1	1652.19	1670.82	1657.04	1593.54	1697.23	1716.99	1749.42	1831.57	1872.13	1847.56	1944.77	1914.97	1968.93	1977	2003.88	2048.84	2030.79	2080.23
2003-05-22	17	26	1	0	1532.94	1566.16	1497.02	1482.44	1465.57	1470.08	1498.51	1428.72	1475.99	1440.37	1396.87	1473.47	1422.22	1468.88	1428.42	1488.98	1482.15	1422.96	1463.69	1482.65	1491.42	1435.67	1530.08	1526.51	1573.94	1583.96	1593.12	1643.69	1573.34	1626.81	1711.9	1708.84	1733.83	1782.84	1899.86	1902.72	1930.91	1924.69	1950.48	2033.98	2017.31	2040.83	2078.78	2084.18	2056.11
2003-05-23	18	25	1	0	1561.96	1549.09	1532.27	1476.98	1514.22	1518.28	1423.9	1476.23	1461.44	1474.96	1482.54	1409.93	1480.05	1438.65	1487.05	1522.53	1507.62	1449.7	1513.76	1465.48	1447.74	1455.61	1538.45	1580.19	1550.1	1613.71	1599.76	1640.57	1592.22	1681.22	1696.77	1745.07	1746.77	1820.93	1913.29	1911.82	1909.24	1968.44	1984.5	2006.52	2002.51	2085.78	2074.24	2138.02	2064.01
2003-05-24	17	25	0	0	1571.26	1531.58	1614.43	1585.76	1529.18	1583.01	1531.15	1568.62	1539.09	1451.83	1502.62	1480.41	1501.18	1444.06	1460.78	1500.49	1428.83	1486.49	1418	1494.43	1460.16	1514.73	1433.47	1500.77	1496.64	1531.22	1567.47	1562.86	1540.07	1579.62	1590.97	1626.91	1669.87	1677.28	1737.72	1783.04	1795.47	1807.99	1820.66	1837.37	1909.64	1933.29	1915.91	1957.18	1975.53
2003-05-25	18	29	0	0	1534.42	1555.6	1531.3	1476.54	1474.01	1389.44	1451.52	1440.55	1425.07	1425.45	1444.82	1422.1	1406.69	1345.37	1408.47	1353.22	1464.87	1448.98	1459.9	1433.89	1418.72	1468.69	1447.82	1478.29	1496.58	1514.59	1552.38	1541.61	1558.38	1579.51	1540.05	1666.16	1624.26	1685.11	1712.72	1765.73	1724.39	1783.62	1803.61	1836.72	1858.9	1825.35	1935.14	1947.19	1943.33
2003-05-26	18	28	1	0	1512.71	1511.63	1447.68	1483.15	1384.07	1436.44	1449.33	1380.89	1432.36	1355.71	1375.12	1412.01	1392.9	1382.5	1331.27	1391.95	1390.03	1418.63	1440.14	1446.75	1442.03	1484.2	1400.31	1529.72	1541.84	1549.97	1522.12	1583.96	1589.94	1578.52	1652.42	1634.82	1759.83	1825.31	1813.09	1892.54	1911.73	1893.12	1963.51	1976.72	1968.98	2044.85	2037.04	2086.06	2049.46
2003-05-27	18	26	1	0	1576.82	1579.36	1588.67	1577.32	1492.32	1526.69	1485.9	1544.03	1495.11	1453.06	1453.41	1515.44	1483.95	1522.36	1527.12	1509.61	1503.94	1536.86	1551.22	1478.15	1551.85	1547.42	1568.98	1608.48	1619.75	1661.07	1617.54	1689.1	1723.81	1673.5	1715.73	1748.6	1792.8	1835.89	1920.94	1947.13	1983.16	1966.18	2016.44	1991.38	2078.21	2072.26	2111.04	2132.55	2149.6
2003-05-28	18	25	1	0	1576.97	1571.24	1550.49	1508.45	1536.08	1517.35	1491.76	1489.54	1484.66	1492.59	1439.84	1510.93	1483.81	1495.42	1468.64	1476.36	1481.12	1448.54	1424.94	1417.82	1479.97	1439.59	1506.14	1499.51	1545.98	1579.89	1598.96	1597.72	1622.39	1668.4	1701.83	1655.28	1694.35	1823.93	1839.87	1907.32	1914.9	1971.83	1935.79	1991.99	1999.31	2041.81	2078.24	2105.27	2107.96
2003-05-29	20	27	1	0	1603.36	1507.96	1527.49	1469.67	1482.26	1509.49	1480.24	1416.51	1448.78	1447.74	1491.09	1474.55	1442.73	1440.44	1409.12	1452.92	1425.62	1478.55	1457.89	1481.12	1500.55	1433.95	1483.27	1530.44	1553.77	1501.28	1618.92	1583.3	1350.93	1347.11	1650.49	1695.43	1721.39	1753.74	1816.91	1852.77	1912.4	1925.33	1906.1	1953.75	1974.26	2005.06	2065.72	2108.93	2058.83
2003-05-30	20	30	1	0	1575.74	1482.44	1503.11	1561.97	1434.36	1475.35	1443.01	1463.25	1453.3	1425.71	1442.45	1411.71	1413.8	1430.55	1458.74	1469.15	1405.32	1416.01	1384.75	1426.75	1468.58	1482.3	1518.65	1486.93	1563.93	1595.04	1570.64	1631	1591.77	1663.4	1665.89	1738.63	1708.64	1846.22	1883.27	1916.78	1883.86	1900.48	1933.5	1948.65	2022.62	2008.09	2078.66	2090.19	2098.22
2003-05-31	20	31	0	0	1584.71	1566.95	1551.65	1518.6	1455.76	1482.33	1463.52	1471.14	1441.56	1437.9	1375.17	1457.36	1447.38	1437.9	1385.68	1467.35	1456.07	1445.81	1442.11	1506.05	1515.66	1500.94	1454.51	1425.8	1534.34	1512.62	1561.6	1577.81	1567.91	1523.61	1583.58	1572.53	1608.46	1743.32	1764.04	1724.22	1800.23	1835.76	1880.87	1838.24	1877.76	1938.31	1910.75	1982.44	1972.36
2003-06-01	21	31	0	0	1494.74	1556.31	1530.34	1464.85	1504.11	1434.51	1439.2	1504.56	1424.95	1402.69	1458.99	1406.67	1389.37	1379.84	1405.56	1407	1385.72	1367.58	1400.62	1365.18	1441.17	1479.45	1452.47	1432.04	1484.21	1536.85	1529.75	1486.9	1493.4	1579.36	1547.86	1579.34	1614.84	1624.73	1683.36	1718.44	1744.44	1702.18	1743.98	1832.78	1794.74	1828.58	1841.93	1860.7	1867.98
2003-06-02	20	31	1	0	1528.52	1453.52	1498.16	1493.02	1419.11	1428.09	1458.85	1402.74	1430.37	1453.12	1444.99	1387.33	1414.51	1443.11	1443.92	1391.08	1436.88	1427	1416.04	1422.43	1412.4	1471.58	1452.4	1510.8	1554.37	1513.07	1545.93	1595.08	1599.77	1585.84	1606.45	1710.98	1753.46	1807.34	1913.93	1871.4	1911.71	2000.19	2042.69	2076.64	2086.99	2132.33	2122.48	2175.41	2159.57
2003-06-03	20	30	1	0	1553.53	1533.08	1468.48	1484.43	1475.09	1487.09	1430.98	1427.03	1464.24	1471.45	1455.46	1413.3	1457.2	1430.91	1434.07	1464.43	1467.95	1383.32	1412.31	1382.21	1475.4	1466.11	1508.36	1514.67	1555.34	1564.96	1595.5	1657.28	1603.14	1667.71	1639.84	1744.11	1738.08	1878.96	1896.99	1927.52	1926.51	1951.41	2006.64	2010.67	2033.29	2067.62	2093.86	2208.19	2175.66
2003-06-04	20	30	1	1	1581.52	1498.62	1578.29	1549.51	1541.65	1449.28	1492.19	1484.93	1493.98	1419.08	1492.88	1464.43	1492.29	1420.67	1493.7	1399.35	1484.81	1473.86	1420.18	1464.16	1531.85	1469.15	1543.88	1547.77	1501.88	1557.86	1613.95	1599.78	1631.2	1572.56	1626.83	1716.6	1731.79	1856.61	1808.42	1911.36	1896.94	1996.57	1967.27	1984.06	2031.55	2091.45	2116.25	2131.02	2074.49
2003-06-05	24	32	1	0	1535.56	1479.47	1532.63	1470.75	1450.01	1411.65	1409.73	1456.11	1395.33	1425.1	1444.24	1390.01	1354.19	1418.24	1430.99	1376.39	1399.53	1460.86	1399.75	1453.42	1416.57	1492.79	1493.59	1537.61	1509.11	1581.09	1597.86	1558.87	1628.59	1633.99	1690.51	1683.46	1803.7	1855.38	1892	1905.88	1955.42	2038.98	2046.06	2015.03	2039.43	2086.82	2169.5	2198.18	2207.48
2003-06-06	21	31	1	0	1628.31	1618.73	1604.59	1609.15	1580.34	1565.22	1520.34	1549.74	1532.31	1555.96	1517.8	1534.73	1536.6	1483.75	1532.59	1521.04	1507.74	1504.05	1487.53	1528.82	1526.27	1495.46	1500.66	1538.79	1587.51	1559.02	1626.74	1639.94	1604.93	1690.64	1675.51	1809.87	1844.34	1946.31	2024.47	2045.4	2102.12	2156.75	2155.93	2184.49	2215.94	2258.33	2306.19	2333.18	2332.82
2003-06-07	21	32	0	0	1563.77	1604.21	1587.86	1547.68	1479.69	1531.03	1516.8	1470.68	1459.26	1498.04	1483.21	1432.59	1476.75	1485.98	1444.15	1467.62	1436.12	1492.6	1434.34	1477.4	1495.75	1518.84	1466.54	1548.99	1570.3	1589.79	1563.46	1612.43	1539.25	1604.38	1659.56	1697.77	1679.78	1735.26	1802.24	1886.78	1880.31	1932.18	1983.98	2015.28	1998.65	2082.53	2110.04	2125.73	2125.76
2003-06-08	23	33	0	0	1628.14	1602.89	1588.82	1518.88	1542.07	1548.77	1467.89	1519.08	1496.89	1497.78	1420.82	1469.44	1423.94	1432.88	1484.34	1451.51	1406.18	1474.03	1467.89	1434.53	1500.16	1459.71	1531.82	1484.44	1541.03	1577.26	1529.72	1591.78	1543.58	1553.92	1631.85	1666.04	1707.92	1684.95	1782.47	1800.91	1856.08	1898.28	1896.93	1960.58	1971.98	1958.58	2040.86	2067.03	2069.82
2003-06-09	22	30	1	0	1528.97	1553.18	1502.32	1523.99	1505.01	1507.93	1428.57	1458.96	1464.12	1478.86	1452.75	1443.87	1450.51	1399.4	1457.1	1463.8	1476.2	1464.02	1476.3	1504.03	1461.13	1504.1	1533.57	1531.28	1519.06	1606.83	1635.65	1650.42	1608.21	1690.89	1665.22	1767.8	1852.19	1965.31	2034.24	2043.38	2176.65	2181.17	2186.81	2217.04	2264.8	2313.89	2317.73	2297.93	2343.37
2003-06-10	22	29	1	0	1666.56	1639.48	1594.84	1639.09	1616.38	1600.22	1631.1	1634.73	1513.17	1571.31	1504.02	1571.23	1547.99	1532.04	1524.41	1538.93	1562.68	1552.77	1570.57	1557.52	1561.72	1524.25	1621.17	1628.45	1659.76	1672.7	1711.62	1706.34	1687.04	1711.06	1784.06	1835.92	1905.4	2010.98	2073.35	2124.16	2110.68	2166.38	2257.75	2256.74	2241.57	2364.42	2325.93	2377.56	2341.11
2003-06-11	20	26	1	0	1671.51	1625.26	1646.7	1609.1	1635.24	1612.61	1608.31	1601.73	1577.84	1572.62	1504.99	1553.64	1565.03	1558.64	1567.09	1509.03	1522.5	1519.42	1545.61	1547.39	1486.74	1555.26	1591.69	1636.01	1591.24	1658.92	1671.54	1702.09	1645.45	1698.1	1758.1	1715.57	1805.87	1906.27	1966.39	1961.46	2052.41	2060.09	2085.59	2079.48	2066.28	2164.78	2099.97	2154.44	2171.19
2003-06-12	19	26	1	0	1593.18	1564.42	1546.6	1481.85	1509.13	1500.52	1497.37	1455.06	1490.81	1480.26	1476.82	1465.61	1493.92	1466.61	1434.36	1467.88	1441.07	1509.86	1458.8	1492.81	1495.65	1507.8	1540.46	1519.13	1560.59	1548.96	1595.33	1615.86	1639.7	1658.65	1635.65	1731.3	1788.33	1818.27	1928.71	1923.05	1958.53	2029.8	2070.73	2012.64	2088.19	2081.44	2174.89	2149.33	2211.77
2003-06-13	21	28	1	0	1575.16	1635.51	1596.34	1546.16	1576.86	1534.76	1493.34	1554.54	1527.07	1491.27	1529.93	1518.81	1502.8	1481.7	1443.48	1509.42	1467.83	1491.28	1444.1	1507.89	1518.88	1572.07	1598.34	1603.91	1630.53	1660.64	1665.19	1674.76	1692.32	1677.16	1724.57	1773.15	1824.69	1868.94	1955.59	1982.31	1987.66	2066.9	2103.35	2129.22	2147.77	2168.98	2204.39	2173.53	2159.45
2003-06-14	21	31	0	0	1620.7	1598.2	1645.75	1573.27	1556.63	1582.13	1606.46	1581.48	1488.12	1489.72	1553.5	1498.13	1549.91	1524.41	1544.01	1474.82	1461.9	1536.39	1467.36	1488.34	1531.12	1526.19	1522.58	1582	1612.38	1633.3	1632.84	1660.69	1670.35	1665.63	1690.99	1752.63	1777.71	1856.03	1836.55	1887.58	1962.22	1935	1961.09	2020.32	2043.19	2101.85	2073.01	2161.45	2158.55
2003-06-15	21	32	0	0	1631.15	1662.8	1595.97	1639.76	1530.7	1517.46	1564.47	1566.12	1541.42	1524.1	1545.41	1490.8	1528.87	1454.88	1489.9	1452.91	1472.32	1494.1	1517.4	1473.09	1527.03	1525.26	1505.63	1539.13	1575.35	1596.38	1623.83	1586.54	1651.76	1597.81	1674.76	1649.3	1736.26	1723.53	1757.75	1828.67	1835.03	1863.8	1889.53	1925.7	1948.41	2002.93	1987.76	2020.3	2020.93
2003-06-16	19	31	1	0	1586.75	1598.86	1530.24	1586.12	1525.81	1541.31	1547.46	1509.67	1544.47	1533.19	1523.65	1463.54	1453.73	1507.11	1429.75	1461.52	1449.22	1518.98	1493.23	1516.82	1507.88	1545.07	1487.08	1585.72	1605.68	1582.38	1652.12	1657.34	1664.04	1662.57	1744.68	1725.01	1818.47	1863.39	1932.77	2034.52	2067.07	2102.08	2097.54	2177.23	2118.02	2197.35	2227.93	2258.78	2217.27
2003-06-17	21	30	1	0	1610.95	1646.69	1594.8	1624.82	1548.77	1553.53	1520.04	1558.09	1548.66	1535.84	1527.15	1523.78	1451.53	1512.25	1502.53	1460.51	1471.26	1525.24	1460.65	1539.27	1559.21	1533.18	1549.96	1560.45	1620.32	1650	1621.47	1671.28	1646.03	1706.59	1694.82	1815.92	1815.8	1952.21	2045.9	2022.22	2091.3	2113.12	2200.43	2247.52	2272.45	2295.33	2368.3	2361.75	2362.65
2003-06-18	21	32	1	0	1663.47	1608.63	1600.02	1579.48	1600.45	1563.31	1634.78	1571.09	1567.01	1502.5	1548.48	1512.26	1543.56	1554.6	1539.51	1481.12	1597.36	1603.33	1530.93	1574.12	1595.53	1548.07	1628.08	1563.24	1672.82	1688.7	1665.88	1723.19	1689.44	1683.68	1794.13	1855.01	1896.6	1995.03	2081.07	2138.01	2153.26	2132.57	2237.29	2261.84	2260.29	2332.68	2352.07	2355.59	2302.05
2003-06-20	21	32	1	0	1672.21	1709.61	1659.51	1654.32	1577.19	1607.56	1563.31	1579.59	1528.12	1501.42	1565.94	1564.94	1484.36	1530.14	1496.8	1609.13	1592	1537.07	1562.64	1570.98	1548.36	1601.06	1623.44	1587.87	1689.65	1707.71	1707.06	1750.52	1713.58	1780.51	1796.58	1889.46	1981.88	2058.15	2130.6	2222.26	2228.5	2245.11	2304.76	2321.09	2351.5	2409.3	2448.07	2448.42	2401.26
2003-06-21	22	28	0	0	1798.43	1741.94	1810.88	1741.19	1744.61	1725.21	1724.72	1718.3	1736.23	1683.39	1680.65	1651.79	1673.43	1579.49	1634.14	1639.81	1572.71	1620.07	1653.47	1607.82	1564.43	1624.3	1642.31	1586	1647.15	1652.44	1596.46	1675.46	1702.76	1677.33	1712.19	1785.37	1740.34	1818.49	1918.12	1958.52	1953.97	1972.39	1999.12	2028.85	2108.53	2073.04	2165.56	2158.54	2214.4
2003-06-22	22	27	0	0	1670.7	1684.63	1651.74	1623.38	1648.64	1634.98	1613.26	1580.91	1588.01	1613.67	1594.37	1569.73	1592.57	1535.15	1602.87	1560.55	1553.86	1503.46	1566.64	1558.54	1572.86	1520.51	1592.6	1622.43	1547.27	1574.64	1627.52	1678.37	1649.61	1635.75	1749.05	1721.67	1792.58	1829.95	1921.47	1937.39	1967.61	2015.67	2075.19	2075.96	2140.71	2157.05	2184.11	2185.98	2175.72
2003-06-23	21	27	1	0	1701.11	1634.23	1669.33	1625.07	1624.69	1604.44	1581.24	1596.77	1522.62	1547.66	1571.57	1564.76	1505.28	1532.26	1520.57	1476.32	1567.18	1555.56	1479.87	1546.6	1564.22	1559.82	1574.53	1527.62	1623.53	1636.94	1612.09	1683.7	1692.41	1716.27	1763.82	1832.86	1886.77	1956.45	2104.43	2098.61	2208.92	2219.09	2285.5	2306.18	2357.17	2403.06	2423.68	2364.1	2449.38
2003-06-24	21	31	1	0	1692.22	1668.42	1641.66	1619.78	1659.01	1606.31	1613.34	1634.68	1577.53	1563	1585.37	1609.84	1533.78	1530.7	1536.43	1595.46	1581.04	1533.63	1521.35	1531.42	1619.05	1613.27	1587.9	1592.83	1641.43	1704.5	1713.48	1741.72	1739.88	1720.11	1788.01	1901.83	1946.21	2021.5	2168.38	2197.07	2278.05	2294.11	2320.18	2361.67	2398.34	2414.42	2474.77	2465.25	2471.6
2003-06-25	24	34	1	0	1735.9	1758.52	1703.74	1675.05	1616.86	1668.32	1629.36	1639.93	1629.81	1556.76	1615.31	1576.11	1588.1	1564.77	1588.62	1594.6	1598.7	1601.36	1603.82	1571.13	1609.84	1584.37	1624.57	1581.99	1676.57	1647.58	1724.23	1742.3	1705.85	1815.2	1851.72	1929.95	1992.22	2108.55	2228.07	2244.52	2360.35	2338.32	2429.56	2476.49	2507.03	2483.71	2562.23	2565.69	2541.3
2003-06-26	23	28	1	0	1825.74	1716.26	1746.44	1734.13	1697.1	1681.74	1655.96	1664.02	1597.19	1634.2	1645.19	1629.37	1607.98	1550.19	1626.51	1580.84	1622.44	1663.28	1602.15	1637.5	1644.87	1665.31	1679.12	1596.86	1712.93	1678.38	1755.16	1796.38	1743.84	1813.37	1815.27	1919.42	1918.41	2074.87	2211.04	2269.5	2308.48	2349.24	2384.56	2419.92	2437.9	2486.25	2515.93	2493.49	2524.15
2003-06-27	23	27	1	0	1746.66	1710.17	1727.62	1710.52	1685.72	1623.01	1659.64	1634.94	1651.11	1571.57	1623.34	1623.54	1620.98	1576.42	1627.58	1598.3	1539.44	1606.32	1578.45	1573.29	1601.95	1567.68	1603.09	1588.34	1618.29	1661.5	1686.42	1673.77	1683.45	1701.43	1724.67	1787.21	1858.6	1865.94	1976.13	1949.34	2056.51	2042.01	2054.26	2126.48	2176.69	2194.76	2218.28	2208.52	2191.22
2003-06-28	21	30	0	0	1674.12	1637.1	1719.75	1665.99	1697.35	1657.48	1586.63	1630.36	1612.4	1613.55	1593.27	1599.7	1590.45	1602.77	1595.72	1571.67	1546.86	1498.52	1557.04	1582.44	1508.23	1523.94	1613.32	1605.4	1630.6	1560.03	1627.37	1632.55	1659.85	1683.11	1732.87	1788.21	1796.05	1876.25	1884.71	1935.77	1992.11	1975.97	1989.29	2050.79	2095.06	2118.39	2166.4	2161.61	2153.28
2003-06-29	22	29	0	0	1788.7	1744.48	1653.29	1689.15	1620.42	1651.84	1638.35	1645.31	1630.14	1578.84	1587.65	1555.15	1576.74	1591.44	1578.9	1554.84	1580.35	1611.43	1571.23	1577.3	1605.68	1610.57	1631.16	1631.55	1619.8	1656.96	1684.36	1699.32	1645.56	1696.53	1737.61	1708.79	1776.61	1887.17	1934.32	1931.53	2004.65	2064.16	2038.82	2097.18	2074.2	2135.19	2137.84	2242.68	2249.47
2003-06-30	24	27	1	0	1670.58	1611.65	1605.07	1673.12	1613.77	1594.24	1592.64	1568.85	1544.8	1575.75	1511.43	1525.07	1530.73	1541.23	1584.6	1510.81	1567.92	1543.4	1513.71	1536.86	1544.52	1567.15	1618.57	1642.07	1600.32	1690.85	1669.12	1698.07	1680.1	1751.05	1767.53	1872.99	1921.6	2053.55	2161.27	2187.24	2237.48	2310.67	2370.11	2366.36	2412.38	2491.82	2533.44	2503.11	2541.89
2003-07-01	23	32	1	0	1783.65	1726.41	1752.66	1704.42	1742.93	1717.15	1706.4	1677.3	1695.96	1650.12	1616.61	1654.63	1641.71	1665.94	1578.19	1604.84	1599.29	1624.28	1626.39	1634.28	1590.32	1572.08	1640.47	1575.19	1657.49	1653.37	1739.85	1656.74	1688.24	1685.35	1791.19	1883.85	1929.61	2046.77	2108.25	2068.01	2163.08	2203.76	2172.34	2242.38	2204.18	2301.5	2289.44	2346.1	2325.99
2003-07-02	22	31	1	0	1692.7	1665.01	1686.37	1610.47	1630.89	1596.08	1609.98	1552.3	1615.13	1591.93	1565.82	1546.33	1558.43	1631.73	1554.06	1564.83	1629.45	1617.3	1534.19	1598.01	1626.92	1560.23	1561.14	1611	1660.78	1697.03	1688.74	1733.94	1693.69	1816.45	1815.39	1892.93	1965.95	2071.83	2130.73	2153.41	2255.8	2333.61	2371.16	2387.78	2432.24	2515.94	2580.86	2562.79	2575.9
2003-07-03	24	31	1	0	1888.16	1799.83	1865.56	1804.68	1780.44	1772.99	1750.51	1675.98	1743.99	1710.26	1674.46	1699.35	1659.34	1689.68	1693.37	1696.28	1707.26	1641.03	1692.02	1695.39	1646.62	1731.23	1661.45	1770.69	1767.78	1695.54	1763.88	1806.55	1812.01	1825.17	1885.06	1964.54	2056.11	2132.79	2269.07	2279.43	2309.03	2347.07	2335.07	2396.75	2429.44	2457.3	2495.51	2487.97	2488.44
2003-07-04	25	32	1	0	1902.86	1882.5	1870.12	1844.8	1779.41	1735.72	1744.39	1701.32	1753.71	1748.01	1725.14	1706.71	1711.48	1715.93	1652.55	1685.09	1694.48	1684.42	1650.39	1702.31	1662.11	1730.44	1682.56	1765.06	1786.1	1829.58	1808.53	1820.39	1856.4	1864.23	1998.81	2094.07	2201.26	2334.45	2424.64	2548.03	2597.14	2582.38	2643.28	2755.47	2761.12	2741.73	2854.57	2837.5	2888.03
2003-07-05	23	27	0	0	1939.06	1855.36	1860.23	1834.18	1766.86	1750.67	1700.43	1695.55	1639.25	1682.47	1636.62	1635.07	1661	1590.68	1646.51	1632.35	1655.56	1654.34	1649.53	1636.77	1629.81	1638.01	1703.44	1675.92	1674.73	1644.35	1736.02	1744.95	1754.02	1754.86	1721.61	1825.96	1862.1	1955.64	1908.87	2018.49	2011.65	2115.73	2142.71	2120.59	2183.17	2188.66	2222.11	2229.99	2227.29
2003-07-06	25	27	0	0	1793.08	1784.6	1711.91	1729.95	1705.85	1697.25	1662.64	1671.19	1692.38	1708.41	1678.81	1656.41	1687.55	1625.45	1646.37	1609.1	1598.79	1626.69	1578.82	1573.51	1592.02	1634.55	1584.3	1671.11	1622.29	1665.02	1686.19	1718.86	1622.4	1699.29	1734.8	1771.44	1766.76	1839.5	1913.1	1955.27	1956.87	2054.9	2029.97	2129.8	2153.61	2181.08	2170.73	2207.14	2234.07
2003-07-07	23	29	1	0	1782.47	1696.1	1712.31	1679.77	1612.01	1678.64	1679.98	1694.2	1640.59	1540.36	1626.4	1566.93	1537.67	1549.34	1529.74	1557.21	1555.22	1602.87	1633.35	1541.51	1625.27	1606.11	1605.75	1617.75	1665.44	1723.32	1647.74	1733.27	1713.69	1764.4	1746.74	1895.54	2003.24	2075.89	2142.63	2246.85	2318.71	2353.3	2365.04	2375.83	2389.15	2413.91	2502.19	2497.63	2488.42
2003-07-08	24	30	1	0	1835.44	1807.21	1743.17	1743.04	1697.98	1709.05	1652.17	1687.71	1684.59	1681.71	1628.2	1595.57	1627.72	1635.36	1594.26	1592.97	1617.97	1649.19	1625.46	1651.05	1643.03	1625.71	1669.67	1668.7	1668.26	1689.86	1725.89	1750.24	1739.76	1809.39	1853.8	1950.45	2060.7	2201.61	2284.99	2334.18	2412.27	2499.29	2542.41	2554.32	2596.24	2585.95	2650.64	2675.87	2609.08
2003-07-09	23	28	1	0	1719.43	1646.17	1637.92	1655.73	1624.36	1620.97	1648.49	1613.65	1574.88	1583.36	1554.01	1569.83	1573.87	1573.29	1573.87	1568.09	1608.87	1661.85	1650.98	1628.05	1580.94	1581.95	1644.99	1692.2	1655.34	1703.29	1732.89	1696.78	1808.12	1747.55	1833.38	1872.21	2029.93	2095.06	2149.26	2253.8	2281.32	2277.64	2295.49	2323.28	2419.14	2430.05	2450.18	2461.95	2491.28
2003-07-10	22	26	1	0	1805.18	1713.9	1740.97	1756.31	1726.23	1653.06	1675.89	1612.35	1668.09	1615.49	1655.41	1679.97	1651.19	1667.01	1610.19	1642.28	1636.92	1645.62	1593.52	1663.66	1582.62	1623.32	1607.24	1673.61	1691.02	1662.31	1730.62	1718.4	1785.01	1746.36	1830.32	1877.5	1980.96	2034.31	2117.3	2144.74	2116.82	2216.69	2247.86	2301.25	2247.45	2300.53	2384.86	2383.85	2335.44
2003-07-11	24	28	1	0	1706.91	1741.38	1722.37	1647.21	1731.02	1680.44	1684.24	1600.83	1666.58	1605.92	1668.81	1651.8	1581.88	1638.84	1597.92	1611.13	1592.82	1636.49	1604.16	1617.53	1593.62	1633.68	1596.61	1654.57	1717.38	1727.17	1717.59	1739.35	1792.54	1736.16	1880.27	1866.44	1972.4	2047.45	2048.14	2064	2129.07	2217.79	2184.55	2215.8	2295.36	2322.8	2423.16	2392.2	2365.01
2003-07-12	24	32	0	0	1752.83	1687.21	1738.39	1689.14	1689.27	1627.72	1670.43	1613.85	1629.45	1608.29	1567.3	1617.9	1546.41	1582.39	1540.61	1615.55	1567.47	1608.52	1570.57	1583.36	1594.55	1576.47	1635.43	1582.86	1682.74	1647.58	1697.75	1720.24	1719.48	1749.12	1738.29	1821.22	1826.22	1869.04	1961.5	2025.33	2038.99	2150.65	2158.07	2209.86	2192.69	2298.84	2347.46	2378.62	2365.94
2003-07-13	27	35	0	0	1848.86	1800.89	1865.72	1843.93	1731.09	1711.61	1736.93	1692.49	1737.16	1657.35	1723.24	1650	1696.58	1641.5	1678.98	1602.63	1658.45	1655.37	1693.73	1637.09	1679.33	1652.13	1667.04	1714.74	1757.51	1742.19	1751.49	1724.77	1793.77	1824.98	1858.71	1875.02	1942.18	2015.18	2094.9	2104.29	2134.33	2206.19	2241.15	2263.1	2335.09	2361.43	2393.23	2465.49	2463.35
2003-07-14	26	34	1	0	1849.1	1816.11	1881.83	1854.44	1741.1	1761.76	1768.41	1701.22	1741	1717.93	1700.53	1698.8	1700.32	1708.85	1640.72	1704.11	1672.42	1699.02	1685.59	1670.38	1731.67	1766.16	1671.72	1761.74	1739.2	1829.24	1840.74	1811.99	1856.81	1917.41	1954.22	2063.19	2176.96	2298.05	2439.81	2494.31	2594.77	2591.27	2727.66	2722.47	2811.98	2888.22	2921.98	2879.75	2921.24
2003-07-16	24	29	1	0	1755.66	1737.05	1720.82	1702.45	1683.16	1647.05	1664.12	1648.25	1641.3	1604.98	1606.13	1601.15	1578.32	1587.19	1595.23	1591.86	1629.37	1665.33	1675.67	1658.28	1596.76	1613.13	1656.53	1734.46	1749.65	1709.32	1795.09	1790.89	1880.18	1894.4	1947.29	1914.61	2088.59	2113.07	2217.95	2328.19	2280.51	2359.83	2390.65	2369.25	2403.35	2453.06	2511.89	2534.2	2481.96
2003-07-17	24	27	1	0	1836.77	1840.59	1841.7	1832.06	1725.02	1703.29	1729.88	1732.89	1693.64	1704.04	1747.12	1682.99	1693.49	1680.99	1623.19	1708.29	1716.72	1711.67	1677.67	1690.56	1692.43	1700.89	1693.54	1784.82	1760.41	1749.85	1820.82	1785.59	1841.01	1865.29	1931.39	2045.41	2107.88	2227.74	2363.34	2420.18	2522.77	2536.5	2631.02	2628.52	2665.28	2713.82	2757.91	2795.86	2780.84
2003-07-18	22	30	1	0	1718.53	1717.43	1710.6	1694.34	1688.62	1685.09	1672.13	1648.37	1697.55	1693.48	1618.78	1635.82	1637.5	1603.07	1634.68	1555.97	1635.64	1623.08	1624.24	1592.48	1597.32	1646.97	1653.67	1682.18	1710.98	1709.21	1761.01	1721.6	1755.33	1786.42	1858.64	1869.05	2001.28	2103.27	2198.75	2208.03	2302.22	2301.03	2295.28	2353.55	2414.32	2448.42	2490.32	2458.18	2504.41
2003-07-19	25	34	0	0	1929.57	1822.14	1843.59	1826.2	1778.35	1733.37	1724.67	1744.56	1743.8	1714.69	1651.69	1725.17	1670.54	1704.55	1655.64	1622.91	1699.78	1723.08	1719.94	1645.6	1681.32	1667.6	1660.2	1709.16	1699.66	1797.96	1750.41	1830.39	1802.81	1807.72	1885.34	1950.49	2031.97	2062.93	2216	2238.35	2316.94	2362.37	2452.61	2417.48	2459.32	2523.83	2528.97	2530.06	2543.52
2003-07-20	24	32	0	0	1803.48	1773.02	1720.09	1766.35	1674.4	1735.77	1749.56	1763.88	1689.98	1637.24	1685.1	1637.11	1670.59	1665.63	1683.22	1700.58	1645.17	1677.54	1599.33	1663.36	1636.29	1647.57	1686.78	1663.51	1707.07	1656.61	1741.06	1767.54	1763.73	1745.03	1742.42	1895.53	1896	1967.38	2050.16	2030.71	2066.88	2115.58	2150.7	2199.37	2252.43	2292.66	2369.45	2377.42	2367.5
2003-07-21	25	33	1	0	1978.26	1944.59	1909.86	1903.58	1842.74	1911.8	1842.19	1793.59	1799.01	1836.24	1818.99	1797.06	1803.25	1767.43	1745.56	1736.65	1712.67	1795.12	1788.16	1751.7	1682.61	1804.53	1753.14	1838.23	1831.13	1806.06	1844.95	1913.82	1948.8	2000.16	2064.95	2138	2239.47	2407.73	2468.53	2634.7	2705.65	2736.47	2791.27	2852.88	2857.15	2878.7	3011.29	3017.2	3011.98
2003-07-22	26	35	1	0	1995.55	2034.56	2008.64	2007.5	1946.17	1943.67	1937.53	1911.72	1833.74	1892.18	1870.21	1889.14	1813.37	1835.24	1876.39	1835.86	1809.63	1811.53	1767.75	1765.95	1803.44	1808.34	1861.47	1832.23	1852.35	1828.69	1891.8	1901.79	1944.6	1986.4	2032.5	2103.93	2226.66	2348.67	2498.98	2536.97	2582.21	2604.38	2685.03	2707.95	2717.95	2766.22	2808.47	2911.27	2845.56
2003-07-23	26	36	1	0	2040.12	2107.98	2074.81	1995.12	1963.3	1867.11	1863.64	1900.26	1827.49	1875.52	1888.77	1881.59	1815.31	1864.25	1864.19	1850.11	1810.75	1866.49	1828.03	1815.16	1836.56	1763.79	1832.75	1837.93	1885.83	1941.12	1927.6	1896.88	1994.08	2019.09	2014.02	2179.51	2278.46	2478.55	2536.34	2654.47	2676.14	2665.91	2792.13	2815.26	2894.17	2921.54	2946.96	2979.94	2929.62
2003-07-24	28	36	1	0	2249.6	2267.95	2237.62	2219.27	2178.86	2131.54	2144.95	2090.43	2110.18	2151.45	2128.23	2036.25	2068.75	2016.16	1994.55	1995.58	2038.27	2021.29	2029.86	1987.3	2007.72	2015.93	1920.35	2032.15	1990.4	2020.14	1996.81	2068.16	2051.27	2202.38	2226.46	2368.58	2521.96	2662.33	2697.11	2832.18	2878.71	2932.53	2955.71	3042.78	3007.31	3119.1	3116.3	3105.4	3107.9
2003-07-25	30	38	1	0	2515.67	2523.98	2499.02	2453.96	2390.96	2377.66	2364.93	2329.31	2291.15	2343.65	2272.51	2277.62	2319.97	2243.51	2235.63	2192.42	2175.71	2198.14	2193.05	2182.49	2179.46	2155.92	2164.33	2185.61	2215.01	2136.12	2235	2194.15	2278.06	2288.15	2421.33	2553.2	2623.19	2778.91	2880.16	2919.74	3040.78	3065.69	3114.94	3132.36	3116.55	3065.26	3077.97	3072.42	3097.33
2003-07-26	29	37	0	0	2553.95	2503.63	2500.14	2428.01	2400.11	2379.11	2349.01	2400.96	2307.09	2369.5	2362.62	2255.72	2306.89	2247.23	2290.37	2231.88	2260.92	2187.06	2226.84	2238.77	2194.6	2146.37	2151.08	2189.04	2151.19	2121.74	2152.87	2182.94	2156.18	2269.69	2231.53	2393.74	2412.64	2506.37	2592.94	2650.61	2640.59	2760.41	2745.62	2771.7	2830.25	2912.03	2961.48	2987.67	2971.05
2003-07-27	28	37	0	0	2520.78	2452.94	2436.36	2418.21	2381.72	2364.05	2274.76	2292.4	2204.99	2194.91	2219.7	2215.84	2188.95	2152.52	2176.33	2117.08	2143.2	2126.18	2082.35	2114.82	2055.61	2102.41	2046.19	2041.27	2090.65	2034.63	2109.26	2085.27	2125.44	2157.46	2209.28	2264.68	2263.37	2361.95	2474	2552.97	2533.66	2622.76	2640.94	2694.72	2744.52	2787.5	2806.09	2856.86	2839.16
2003-07-28	29	36	1	0	2596.82	2558.19	2488.9	2412.32	2432.72	2398.7	2376.12	2315.02	2374.82	2340.99	2336.16	2309.81	2243.33	2197.2	2227.57	2200.31	2250.45	2189.98	2210.78	2203.61	2172.21	2124.23	2159.49	2172.56	2192.1	2210.04	2191.03	2225.2	2260.93	2276.76	2400.48	2487.07	2574.74	2764.61	2835.65	2916.63	2976.42	2964.23	3079.31	3065.23	3086.41	3094.49	3166.81	3197.43	3180.18
2003-07-29	30	37	1	0	2751.06	2692.4	2676.54	2610.32	2611.31	2546.47	2551.69	2465.41	2491.66	2442.71	2491.75	2410.85	2414.26	2450.04	2420.27	2372.81	2370.34	2368.63	2364.86	2343.21	2281.17	2297.17	2276.23	2237.13	2281.39	2302.04	2268.99	2329.35	2319.27	2424.46	2452.62	2617.7	2726.64	2863.76	2922.12	3012.29	3051.88	3016.95	3098.28	3016.64	3109.96	3151.04	3139.32	3158.11	3148.62
2003-07-30	29	38	1	0	2780.77	2761.3	2732.07	2682.61	2633.43	2548.03	2567.89	2530.64	2529.74	2483.23	2422.62	2473.28	2392.95	2423.18	2424.34	2381.17	2348.33	2402.48	2337.73	2350.51	2304.3	2240.47	2221.66	2285.52	2301.02	2241.12	2319.89	2346.13	2359.48	2350.18	2444.18	2566.53	2686.4	2767.34	2915.4	2963.07	3028.99	3052.09	3125.4	3148.28	3200.24	3176.24	3200.95	3266.23	3284.99
2003-07-31	30	38	1	0	2741.43	2696.93	2715.51	2647.26	2568	2596.39	2539.14	2511.6	2537.69	2482.86	2489.76	2425.75	2420.82	2428.86	2412.91	2360.33	2390.17	2449.28	2350.64	2346.24	2389.88	2263.1	2278.55	2254.49	2257.46	2326.58	2247.86	2348.16	2343.08	2368.66	2475.7	2622.69	2676.27	2801.29	2917.31	2972.52	3043.34	3088.17	3169.04	3217.32	3211.78	3268.64	3292.87	3343.16	3354.93
2003-08-01	30	38	1	0	2749.76	2775.13	2704.18	2661.48	2597.2	2625.26	2554.01	2575.51	2496.61	2562.24	2540.11	2507.55	2434.68	2461.75	2452.6	2443.55	2370.02	2394.5	2389.93	2303.02	2302.76	2314.88	2233.55	2292.31	2279.58	2287.33	2266.82	2318.64	2347.43	2362.27	2464.59	2553.26	2698.3	2784.95	2908.82	2938.14	3034.92	3074.97	2879.63	3037.26	3062.19	3090.26	3110.18	3145.79	3117.57
2003-08-02	30	39	0	0	2838.58	2771.4	2770.15	2739.9	2681.55	2666.32	2616.74	2626.76	2629.97	2529.4	2595.63	2496.71	2519.15	2482.1	2521.72	2529.05	2428.64	2487.96	2442.72	2469.77	2360.21	2385.24	2371.77	2327.18	2316.64	2331.47	2345.7	2373.64	2309.46	2450.71	2494.13	2542.36	2588.99	2636.59	2762.58	2848.24	2843.65	2950.09	2968.65	3015.23	3070.79	3053.93	3069.76	3110.5	3123.17
2003-08-03	30	38	0	0	2702.53	2634.28	2558.41	2538.92	2536.02	2459.45	2469.36	2389.05	2355.12	2336.43	2360.53	2337.81	2312.95	2377.94	2359.14	2304.22	2318.93	2369.52	2281.89	2336.4	2294.02	2228.14	2274.59	2177.27	2225.7	2263.89	2232.3	2262.56	2279.24	2322.65	2294.8	2433.08	2444.18	2558.75	2631.9	2677.53	2788.29	2775.21	2915.72	2916.47	3002.85	2962.53	3105.88	3091.69	3110.2
2003-08-04	27	35	1	0	2206.28	2183.39	2187.74	2067.51	2025.21	2065.14	2051.56	2026.42	1953.62	2010.32	2033.91	1987.4	1910.75	1968.86	1907.43	1957.59	1978.21	2010.31	1920.25	1938.33	1936.06	1914.22	1971.78	1991.76	1982.51	2002.37	2027.74	2036.51	2057.71	2145.59	2164.7	2310.83	2387.22	2436.26	2553.3	2619.08	2712.94	2726.42	2756.07	2795.57	2867.55	2947.24	2937.41	2950.55	2956.23
2003-08-05	27	35	1	0	2243.65	2196.45	2187.47	2158.54	2071.72	2107.55	2078.9	2064.91	2055.61	1994.63	2014.34	1994.21	1994.97	2007.98	1998.26	1980.25	2015.96	2020.52	1959.35	1965.92	2012.01	2011.94	1961.99	2010.95	2073.15	2036.34	2070.3	2159.91	2219.74	2264.6	2312.74	2460.13	2504.73	2595.23	2700.78	2825.9	2823.62	2863.98	2905.99	2996.27	2979.78	3035.81	3063.69	3103.01	3056.03
2003-08-06	26	34	1	0	2375.7	2309.78	2356.89	2274.36	2250.91	2178.46	2201.97	2139.6	2130.19	2105.26	2103.47	2074.2	2052.77	2060.93	2073.36	2003.56	2020.12	1971.58	2038.81	2046.65	2026.92	1950.81	2051.9	2079.76	2024.75	2065.4	2063.53	2128.61	2123.85	2216.85	2235.65	2372.58	2433.93	2598.22	2698.04	2755.65	2826.32	2809.03	2853.14	2962.47	3001.96	3059.62	3076.04	3104.68	3099.76
2003-08-07	29	36	1	0	2580.82	2540.86	2470.73	2478.29	2372.9	2391	2391.55	2316.76	2343.11	2321.63	2282.22	2206.55	2202.06	2263.28	2255.82	2234.36	2161.25	2256.95	2161.6	2194.64	2188.17	2145.62	2205.27	2161.47	2194.4	2166.29	2222.74	2228.07	2298	2299.03	2388.15	2562.99	2652.16	2714.05	2909.27	2893.33	3023.51	3034.05	3104.96	3152.77	3155.95	3135.22	3180.43	3180.79	3165.85
2003-08-08	27	35	1	0	2614.84	2550.42	2539.95	2474.8	2431.34	2396.39	2382.91	2370.99	2293.68	2316.25	2230.23	2260.45	2252.16	2199.24	2231.62	2245.62	2170.24	2167.84	2172.5	2154.12	2211.96	2157.69	2095.48	2124.54	2129.92	2179.17	2178.68	2236.91	2243.36	2270.38	2407.13	2527.02	2604.72	2663.83	2777.19	2818.87	2904.2	2918.39	3002.99	2989.8	3071.02	3090.82	3117.55	3096.22	3125.26
2003-08-09	26	32	0	0	2423.9	2372.92	2398.92	2289.02	2267.9	2213.23	2267.12	2163.26	2186.04	2167.74	2124.42	2151.41	2131.83	2122.52	2071.81	2106.5	2109.71	2166.18	2097.98	2086.75	2109.57	2044.44	2073.97	2052.34	2056.23	2106.02	2094.65	2081.36	2146.16	2174.89	2195.04	2225.77	2357.52	2401.63	2438.5	2517.33	2523.88	2623.1	2633.54	2682.26	2684.82	2739.47	2779.94	2730.22	2738.08
2003-08-10	25	31	0	0	1966.81	1996.73	2016.3	1963.08	1890.19	1875.88	1845.65	1879.23	1851.09	1813.44	1849.42	1829.29	1822.4	1846.71	1834.81	1855.61	1828.32	1827.7	1867.5	1781.87	1821.75	1835.57	1855.38	1858.98	1853.77	1905.96	1967.75	1893.81	1979.87	1961.94	2039.08	2042.95	2185.45	2173.9	2192.66	2252.47	2284.34	2392.81	2432.62	2453.68	2440.71	2558.91	2492.97	2568.98	2500.89
2003-08-11	26	31	1	0	1980.9	1963.49	1899.1	1920.99	1871.95	1883.31	1870.42	1791.62	1856.78	1849.55	1755.08	1787.47	1838.69	1822.03	1734.59	1784.39	1744.23	1800.81	1773.14	1793.36	1735.95	1725.74	1813.09	1786.78	1887.26	1839.48	1877.02	1936.62	1928.97	2003.1	2038.37	2152.67	2214.1	2265.6	2365.84	2419.69	2445.08	2508.9	2539.25	2589.47	2606.19	2660.94	2655.07	2682.3	2667.68
2003-08-13	22	26	1	0	1747.39	1703.96	1644.03	1633.37	1649.2	1589.58	1552.2	1571.34	1564.15	1568.17	1568.06	1484.73	1546.53	1493.71	1506.61	1547.36	1554.81	1608.85	1578.81	1591.39	1603.39	1538.82	1611.2	1625.73	1668.59	1633.2	1686.62	1719.57	1686.31	1798.49	1842.88	1900.81	1922.7	2004.57	2026.5	2099.53	2097.6	2130.55	2162.87	2133.12	2199.26	2198.53	2266.16	2276.51	2228
2003-08-14	20	23	1	0	1594.61	1657.86	1647.74	1607.57	1555.84	1510.37	1583.57	1491.99	1491.32	1482.85	1544.98	1465.81	1526.57	1528.99	1524.75	1535.61	1532.67	1592.04	1560.06	1527.58	1578.33	1580.6	1598.82	1561.61	1615.36	1630.75	1690.12	1642.33	1703.04	1716.16	1802.82	1798.83	1886.55	1937.46	1965.77	1978.85	2055.89	2083.81	2045.53	2072.5	2161.2	2171.54	2196.54	2153.52	2177.15
2003-08-15	22	25	1	0	1653.59	1639.67	1656.47	1571.81	1589.74	1552.9	1572.62	1491.54	1569.25	1557.4	1526.34	1469.36	1524.2	1527.62	1493.32	1508.13	1564.4	1562.81	1577.79	1527.72	1552.69	1505.99	1594.14	1582.07	1649.6	1591.31	1690.79	1733.21	1662.51	1708.33	1801.86	1860.65	1918.7	1959.81	2040.94	1989.44	2094.69	2065.34	2173.23	2177.58	2178.43	2236.26	2223.34	2220.48	2246.23
2003-08-16	24	28	0	0	1672.67	1632.46	1647.35	1653.97	1576.61	1577.44	1610.38	1593.19	1546.86	1564.87	1545.16	1563.04	1502.36	1542.16	1539.43	1518.74	1505.98	1566.42	1623.29	1593.12	1600.05	1561.04	1583.06	1628.18	1689.84	1695.5	1646.28	1717.04	1758.52	1776.54	1777.82	1861.02	1858.22	1890.64	1911.68	2019.09	2100.54	2042.84	2140.19	2143.71	2165.4	2182.24	2205.98	2193.4	2235.42
2003-08-17	23	26	0	0	1670.28	1657.99	1727.49	1626.48	1597.96	1589.2	1599.47	1592.18	1558	1583.77	1569.42	1562.64	1523.39	1531.97	1595.41	1586.8	1608.64	1584.96	1640.32	1546.68	1595.9	1650.41	1638.93	1611.94	1624.41	1642.47	1675.61	1661.16	1692.83	1780.72	1748.39	1854.09	1822.83	1884.83	1938.86	1953.96	1985.25	2019.5	2021.6	2102.56	2139.75	2121.4	2099.99	2193.9	2129.46
2003-08-18	25	30	1	0	1668.44	1658.35	1671.24	1586.76	1604.97	1581.28	1545.43	1544.29	1550.66	1543.38	1515.33	1544.19	1503.54	1539.68	1557.96	1539.32	1554.44	1587.99	1558.98	1596	1580.76	1553.16	1612.05	1636.39	1624.38	1707.4	1719.22	1698.61	1745.72	1779.71	1824.84	1901.14	1928.85	2033.99	2045.43	2170.73	2198.64	2160.59	2274.85	2275.96	2338.72	2298.19	2380.79	2377.49	2330.56
2003-08-19	23	27	1	0	1658.94	1669.29	1696.52	1659.78	1629.53	1601.09	1619.15	1559.42	1598.88	1616.69	1555.01	1561.56	1575.28	1587.51	1594.59	1574.43	1637.65	1573.18	1605.2	1592.07	1558.07	1633.59	1634.68	1639.15	1670.3	1672.42	1693.79	1690.36	1754.47	1758.3	1804.31	1933.08	1963.77	2043.06	2035.42	2123.21	2123.61	2199.34	2195.25	2184.91	2255.16	2247.32	2285.12	2297.65	2263.07
2003-08-20	24	31	1	0	1764.93	1737.47	1661.1	1623.58	1627.46	1623.18	1575.49	1631.95	1569.31	1531.51	1584.13	1620.45	1544.58	1564.53	1603.9	1604.27	1597.32	1585.41	1595.25	1607.8	1558.58	1606.55	1598.54	1674.55	1696.63	1718.26	1717.21	1765.15	1777.46	1786.9	1852	1918.5	1950.26	2030.89	2153.61	2226.7	2244.28	2305.48	2282.67	2369.81	2415.21	2406.83	2444.77	2501.18	2477.4
2003-08-21	25	32	1	0	1783.52	1796.91	1786.61	1727.04	1727.34	1701.96	1643.58	1708.3	1682.81	1700.33	1599.2	1636	1650.02	1607.67	1685.15	1641.72	1633.57	1623.17	1652.48	1587.03	1621.23	1639.05	1726.55	1751.09	1708.49	1835.68	1792.83	1870.36	1860.89	1915.83	1991.33	2058.1	2125.57	2216.5	2303.02	2362.99	2463.84	2516.04	2555.95	2556.24	2560.35	2637	2632.47	2686.37	2672.58
2003-08-22	27	35	1	0	1994.04	1942.33	1966.37	1890.18	1791.42	1842.57	1829.23	1831.81	1808.57	1799.6	1787.61	1719.8	1763.09	1690.36	1774.55	1758.6	1770.51	1763.82	1775.05	1733.12	1790.32	1777.29	1795.54	1819.54	1784.29	1877.61	1856.57	1930.89	1957.72	2053.19	2041.02	2168.81	2267.04	2391.35	2503.14	2594.62	2655.45	2747.02	2789.91	2819.21	2781.45	2833.16	2910.35	2939.95	2911.62
2003-08-23	27	35	0	0	2199.71	2217.7	2204.49	2082.4	2075.47	1998.44	2043.03	1978.95	1981.82	1944.2	1967.43	1914.33	1938.14	1939.93	1944.07	1917.53	1909.59	1917.12	1968.47	1960.75	1945.69	1893.07	1890.51	1888.79	1930.25	1988.94	1961.01	2008.63	2060.08	2035.43	2106.74	2224.57	2245.04	2327.87	2405.97	2488.25	2494.61	2602.97	2627.72	2700.1	2739.95	2755.13	2865.29	2854.72	2836.21
2003-08-24	26	35	0	0	2276.54	2269.74	2320.54	2179.25	2172.96	2191.65	2156.36	2171.17	2153.75	2105.59	2119.85	2029.09	2061.45	2011.63	2095.01	2040.09	2035.04	2035.21	1996.91	2021.09	2034.54	1979.99	1935.06	2032.51	1992.18	1981.82	2072.12	2007.81	2087.7	2096.84	2141.55	2196.36	2198.61	2307.39	2311.51	2443.87	2443.05	2514.89	2549.7	2615.77	2571.52	2696.12	2653.42	2733.19	2685.9
2003-08-25	26	32	1	0	2144.71	2099.47	2110.7	2010.1	1961.18	1956.72	1973.71	1961.19	1877.81	1911.31	1924.72	1901.22	1845.03	1867.79	1941.93	1913.68	1881.58	1891.8	1893.8	1848.67	1893.85	1921.28	1824.13	1919.48	1863.09	1943.27	1920.98	1978.01	2014.76	2089.89	2060.07	2208.74	2303.84	2351.31	2473.53	2532.95	2590.41	2612.92	2670.41	2715.93	2724.07	2756.73	2795.24	2784.22	2778.92
2003-08-26	26	32	1	0	2011.18	2011.87	2023.53	1968.45	1913	1908.13	1882.88	1831.46	1804.28	1845.76	1811.59	1820.36	1805.14	1809.96	1795.23	1811.66	1859.13	1771.3	1846.88	1867.54	1852.32	1858.47	1829.77	1812.73	1891.57	1918.34	1919.95	1957.04	2005.53	2041.23	2076.65	2197.98	2348.73	2376.75	2469.69	2589.31	2639.86	2763.16	2708.7	2857.22	2832.13	2900.66	2992.19	2906.55	2899.92
2003-08-27	27	34	1	0	2284.45	2166.11	2162.51	2117.84	2084.7	2066.16	2047.32	1991.62	1942.18	2006.65	1984.54	1954.27	1943.3	1954.7	1872.01	1956.63	1897.27	1934.3	1925.82	1862.58	1945.91	1895.3	1949.22	1935.05	1925.43	1998.02	1990.58	2028.75	2069.3	2125.45	2218.26	2322.43	2454.43	2500.32	2628.77	2744.81	2796.99	2901.03	2925.76	2980.66	2958.76	3012	3089.65	3047.31	3058.11
2003-08-28	25	32	1	0	2133.17	2106.84	2126.33	2053.16	2055.3	2012.2	1988.62	1958.01	2007.95	1945.63	1898.59	1881.74	1913.7	1893.37	1891.8	1902.78	1871.57	1888.61	1835.12	1886.94	1863.12	1884.98	1874.61	1945.67	1924.96	1970.21	1991.8	1989.18	2015.97	2093.92	2203	2266.72	2390.02	2442.6	2528.77	2620.28	2728.48	2795.36	2840.4	2849.75	2872.7	2930.23	2958.13	2943.27	2978.35
2003-08-29	26	31	1	0	2255.8	2267.91	2246.93	2213.29	2162.86	2080.92	2126.81	2078.07	2057.94	2017.4	2034.15	2006.71	1982.04	1925.84	1971.79	1972.14	1929.56	1958.88	1972.2	1981.18	1928.83	1925.24	1964.88	1908.82	1969.9	2017.45	1978.9	2040.24	2104.44	2083.62	2155.37	2230.59	2416.52	2486.97	2595.07	2597.71	2738.22	2737.31	2789.11	2853.67	2841.81	2913.08	2882.43	2911.8	2838.08
2003-08-30	24	28	0	0	1873.66	1865.21	1827.51	1793.48	1792.97	1762.29	1747.85	1699.06	1739.94	1661.31	1698.58	1707.45	1639.84	1674.36	1744.6	1758.85	1733.99	1741.03	1700.57	1683.32	1722.35	1722.63	1686.32	1754.17	1786.45	1765.25	1789.08	1858.66	1838.3	1871.42	1916.1	1972.23	1992.5	2023.31	2069.58	2153.06	2146.77	2218.24	2210.59	2248.27	2242.49	2274.1	2318.16	2300.43	2279.16
2003-08-31	25	29	0	0	1670.24	1727.22	1666.81	1606.53	1595.26	1584.99	1589.79	1577.69	1521.27	1559.54	1518.91	1565.78	1578.81	1511.2	1523.34	1578.93	1605.29	1610.79	1551.95	1581.29	1607.44	1552.66	1625.12	1660.85	1656.98	1629.19	1708.01	1714.39	1697	1739.93	1759.55	1805.56	1825.35	1834.98	1817.66	1930.11	1922.86	1955.91	1999.08	2014.56	2079.35	2017.85	2065.04	2093.66	2079.77
[truncated: 51 more columns]
